1 **Cells function as a ternary logic gate to decide migration direction under**  
2 **integrated chemical and fluidic cues**

3 Hye-ran Moon<sup>1</sup>, Soutick Saha<sup>2</sup>, Andrew Mugler<sup>2,3,4</sup>, and Bumsoo Han<sup>1,3,5,\*</sup>

4

5 <sup>1</sup> School of Mechanical Engineering, Purdue University, West Lafayette, IN 47907, USA

6 <sup>2</sup> Department of Physics and Astronomy, Purdue University, West Lafayette, IN 47907, USA

7 <sup>3</sup> Center for Cancer Research, Purdue University, West Lafayette, IN 47907, USA

8 <sup>4</sup> Department of Physics and Astronomy, University of Pittsburgh, Pittsburgh, PA 15260, USA

9 <sup>5</sup> Weldon School of Biomedical Engineering, Purdue University, West Lafayette, IN 47907,  
10 USA

11

12 \* Corresponding Authors: 585 Purdue Mall, West Lafayette, IN 47907, USA

13 Phone: +1-765-494-5626

14 Fax: +1-765-496-7535

15 E-mail: [bumsoo@purdue.edu](mailto:bumsoo@purdue.edu)

16

17 Keywords: cellular sensing and processing machinery, directed cell migration, systems biology.

## 18 **Abstract**

19       Cells sense various environmental cues and process intracellular signals to decide their  
20 migration direction in many physiological and pathological processes. Although several  
21 signaling molecules have been identified in these directed migrations, it still remains elusive how  
22 cells decipher multiple cues, specifically chemical and fluidic cues. Here, we investigated the  
23 cellular signal processing machinery by reverse-engineering directed cell migration under  
24 integrated chemical and fluidic cues. We exposed controlled chemical and fluidic cues to cells  
25 using a microfluidic platform and analyzed the extracellular coupling of the cues with respect to  
26 the cellular detection limit. Then, the cell's migratory behavior was reverse-engineered to build  
27 the cell's intrinsic signal processing system as a logic gate. Our primary finding is that the  
28 cellular signal processing machinery functions as a ternary logic gate to decipher integrated  
29 chemical and fluidic cues. The proposed framework of the ternary logic gate suggests a  
30 systematic approach to understand how cells decode multiple cues to make decisions in  
31 migration.

## 32 **Introduction**

33 Directed cell migration is ubiquitous in many physiological and pathological processes,  
34 including cancer metastasis, embryonic development, inflammation, wound healing, and  
35 angiogenesis [1-6]. During these processes, cells sense and process multiple and often  
36 heterogeneous cues. These cues are chemical, mechanical, and fluidic ones [4,7-9]. Even though  
37 extensive research has been performed to identify key signaling molecules for various  
38 environmental cues, it is still puzzling how cells decipher simultaneous heterogeneous cues and  
39 decide on a migration direction.

40 Cells can sense a chemical cue – a concentration gradient of chemokines or growth factors  
41 – through corresponding receptors on the cell surfaces, including G-protein coupled receptors  
42 (GPCR) and receptor tyrosine kinases (RTK) [5,10,11]. Cells can also sense a fluidic cue for  
43 directed migration [12-14]. Although it has not been fully understood, shear flow sensing has  
44 been considered either by force transmission through integrins for endothelial cells [15,16] or  
45 surface glycocalyx for cancer cells [17], or autologous chemotaxis involving ligand secretion and  
46 detection near the cell surface [18]. After sensing these chemical or fluidic cues, cells transduce  
47 the cues into the migratory signal via complex intracellular pathways to execute the directed  
48 migration. For instance, RTKs locally activate GTPases through the Rho subfamily,  
49 phosphoinositide3-kinase (PI3K), and ROCK/LIMK/cofilin pathways when detecting  
50 corresponding chemical cue to regulate actin polymerization, microtubule dynamics, and  
51 adhesion dynamics, eventually governing cellular polarization and asymmetric force generation  
52 for directed migration [5,19-23]. Furthermore, fluidic cue sensing can steer the directed  
53 migration by activating focal adhesion kinases (FAK) through integrin, ERK, and PI3K [15,24-  
54 26]. Indeed, cell trajectories were mostly aligned to the flow streamlines with FAK activation,

55 where the FAK are signaling networks governing mechanotransduction involved in local  
56 activation of the Rac pathway to govern actin dynamics [24,25]. T lymphocytes could also sense  
57 the fluidic cue and showed directed migration toward the upstream direction of blood flow  
58 requiring LFA-1 of T-cell integrins and corresponding pathways such as PI3K and ERK [27,28].  
59 Besides investigating molecular pathways of directed cell migration, the cellular sensing and  
60 processing machinery has been modeled as a biological processor in synthetic biology [29-31].  
61 The synthetic models illustrate the cellular signal processing machinery composed of signal  
62 inputs (sensing), a logic system as a processor and an actuator (processing through complex  
63 intracellular signal networks), and outputs (cellular responses).

64         Despite advances in understanding the effect of either a chemical or fluidic cue alone, how  
65 cells respond to integrated chemical and fluidic cues is still not well understood. Cellular  
66 response to multiple cues has been studied in the context where both cues are chemical. In many  
67 cases, exposing cancer cells to two growth factors showed a synergistic effect on cell motility  
68 [32-35]. When one of the growth factors stimulates cells in the form of gradient, the other can  
69 have either a synergistic [36,37] or antagonistic [38] effect on directional accuracy or motility for  
70 directional migration. While the synergistic combination of the chemical cues was shown from  
71 the cooperative effect of their downstream pathways [39,40], antagonistic results were illustrated  
72 with cells' signal-processing capacity [38]. The cell's ability to sense and process multiple  
73 chemical cues simultaneously has been physically modeled to predict limits of the cellular ability  
74 [41,42] or to distinguish one chemical from another [43-45]. Nonetheless, in comparison to  
75 integrating multiple chemical cues, the integration of chemical and fluidic cues has been  
76 understudied, although cells are exposed to both chemical and fluidic cues *in vivo* [16,46].

77           In the present study, we investigated the cellular signal processing machinery by reverse-  
78 engineering directed cell migration to elucidate a biophysical understanding of how cells  
79 decipher integrated chemical and fluidic cues to determine migration direction. We exposed  
80 controlled chemical and fluidic cues on a murine pancreatic cancer cell line (KIC) in the collagen  
81 matrix using a microfluidic platform and analyzed extracellular complication of the cues with  
82 respect to cellular detection limit. Specifically, we applied pressure-driven flow to the cells that  
83 were simultaneously exposed to the TGF- $\beta$  gradient in two scenarios: 1) parallel flow of an  
84 additive cue with the TGF- $\beta$  gradient and 2) counter flow of a competing cue to the TGF- $\beta$   
85 gradient. Under these integrated cues, we characterized the directional accuracy of cell migration.  
86 The results were reverse engineered to construct cell's intrinsic signal processing system as a  
87 logic gate. The results were further discussed to lay the groundwork of a systematic approach to  
88 understand how cells decode multiple cues to make decision in migration.

89

## 90 **Results**

### 91 **Creation of a cellular microenvironment with controlled chemical and fluidic cues**

92 To evaluate the effect of the integrated chemical and fluidic cues, we engineer the  
93 cellular microenvironment by using a microfluidic platform having a center and two side  
94 channels [38,47]. A center channel contains cells embedded in a type I collagen mixture in the  
95 platform, where two adjacent source and sink channels are filled with the medium. The chemical  
96 gradient and pressure-driven flow are simultaneously developed in the center channel by  
97 manipulating both chemical concentration and pressure variances between source and sink  
98 channels as described in **Materials and Methods**. Here, we consider two combinations based  
99 on the flow direction: parallel and counter flow (**Figure 1A**). A parallel flow is represented as a  
100 positive direction (+) to the chemical gradient where the flow direction is from the higher to  
101 lower concentration of the chemical. On the other hand, the direction of the counter flow is  
102 represented as a negative direction (-) to the chemical gradient flowing from lower to higher  
103 concentration. By using the platform, we investigate the migration behaviors of cells under the  
104 engineered environment of integrated chemical and fluidic cues. We use murine pancreatic  
105 cancer cells (KIC cells) whose directed migration is stimulated by the TGF- $\beta$  gradient  
106 [10,38,48]. The directed cell migration is often characterized by its directional accuracy,  
107 directional persistence, and motility [47,49]. In this study, we focus on the directional accuracy,  
108 representing how cells accurately follow the cue direction. In order to quantify the cellular  
109 directional accuracy to an environmental cue, we use a directional accuracy index (DAI; see  
110 **Materials and methods**) as defined in **Figure 1B**. Here, we note that the DAI distribution of the  
111 control is concentrated at the extremes of -1 and 1, this is an expected and well-known

112 consequence of the cosine in its definition, as a uniform distribution of angles produce a  
113 nonuniform distribution of cosines that is more concentrated at the extremes [38,47,50,51].

114 As a result, the KIC cells showed significantly enhanced directional accuracy responding  
115 to the TGF- $\beta$  gradient (**Figure 1C, magenta**), consistent with previous studies [38,48]. The  
116 directed migration is notably induced by a TGF- $\beta$  gradient so that the DAI is biased towards 1,  
117 indicating that the cells' movement is biased toward a (+) direction (**Figure 1D, magenta**). In  
118 contrast, the control group is unbiased as a median of the DAI distribution is close to 0 (**Figure**  
119 **1D, gray**). In addition to chemical cues, we observed the flow-induced directed migration of  
120 KIC cells, as shown in **Figure 1C (cyan)**, when the cells were exposed to the flow of  
121 approximately 1.5  $\mu\text{m/s}$  (**See details in Materials and Methods section and Figure S1**). The  
122 DAI distribution of cells in response to the flow is biased toward 1, indicating that the cells move  
123 to the upstream flow direction as reported previously [25]. The DAI distribution of cells in  
124 response to the flow is significantly biased compared to the control, as shown in **Figure 1D**.  
125 These results confirm that the KIC cells respond to chemical and fluidic cues.

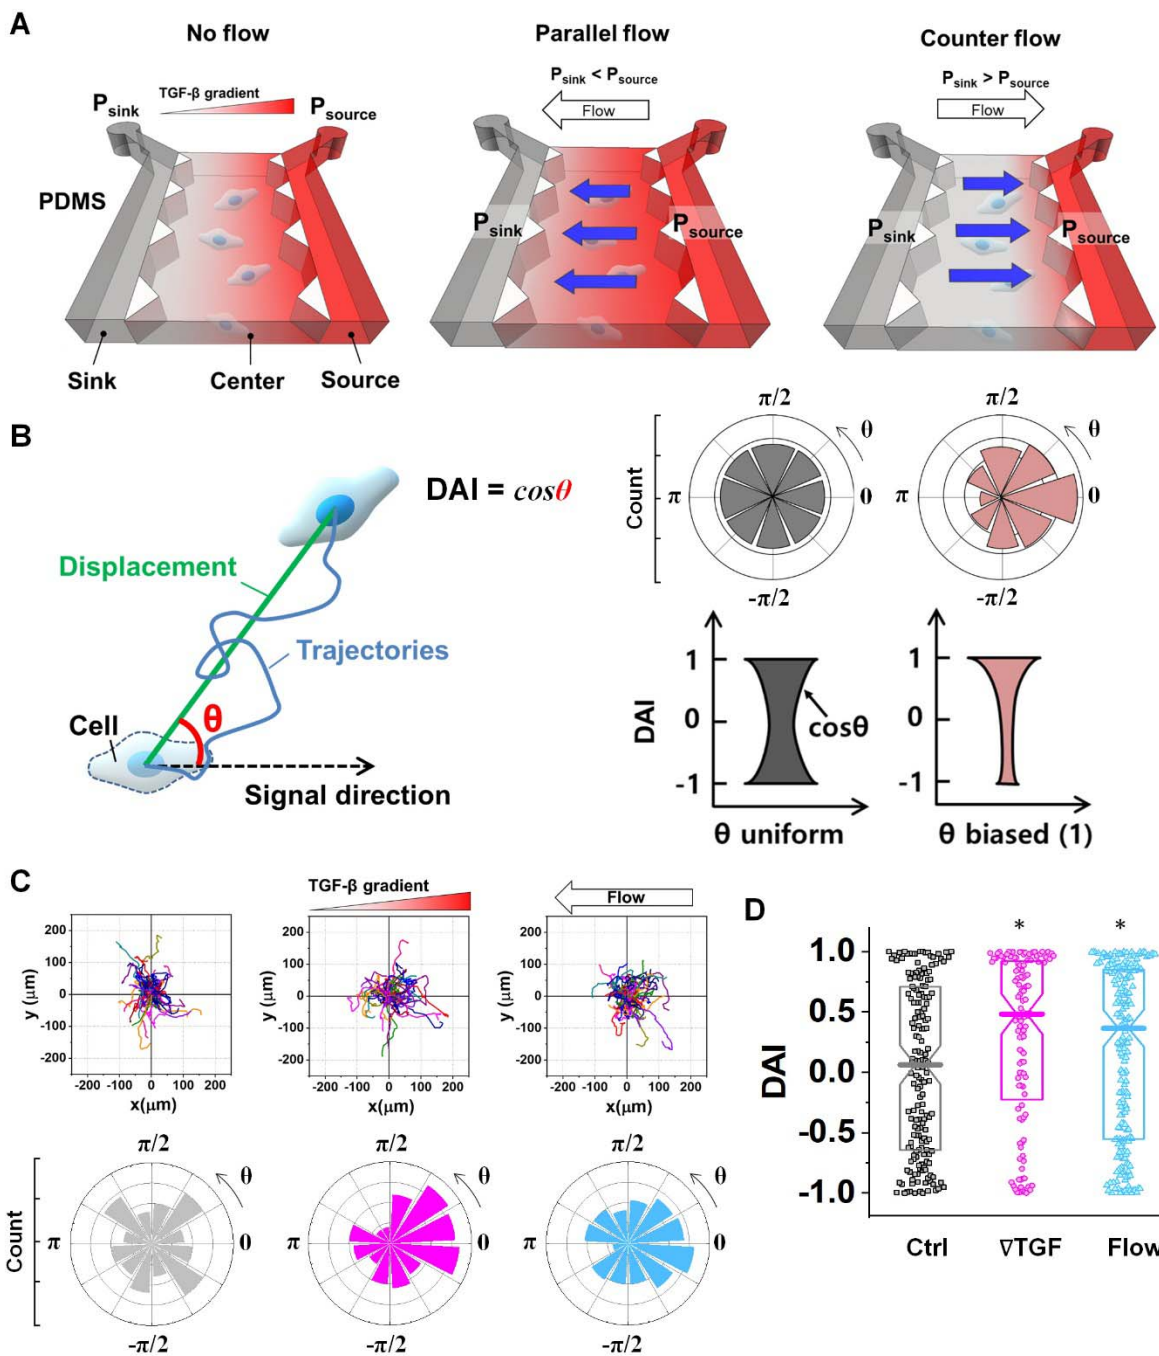

126

127 **Figure 1. Microfluidic platform of directed cell migration under the integrated chemical**  
 128 **and fluidic cues.** (A) Schematic description of a microfluidic platform to induce the chemical  
 129 gradient with pressure driven flow (Flow). Flow direction is defined based on the chemical  
 130 gradient – the chemical gradient and pressure gradient is aligned; parallel flow, and the chemical



131 gradient and pressure gradient is in opposing directions; counter flow. (B) Directional migration  
132 is characterized with directional accuracy index (DAI) defined as a cosine of the angle ( $\theta$ )  
133 between the cue and displacement direction. (C) Representative cell migration trajectories of  
134 control (Ctrl, grey), 10nM/mm TGF- $\beta$  gradient ( $\nabla T$ , magenta), and interstitial flow (Flow, cyan)  
135 and angular distribution for  $\theta$  respectively (D) DAI distribution of collected cell trajectories of  
136 Ctrl,  $\nabla T$ , and Flow. Box: quartiles with a median line in the middle of the box. Dot: the  
137 corresponding metric from a single trajectory. \*:  $p < 0.05$  (Mann-Whitney U-test)

138 **Extracellular combination of the chemical and fluidic cues creates regions where the**  
139 **chemical cue becomes below the cellular sensing limit.**

140 Chemical cues in the cellular microenvironment are transported by not only diffusion but  
141 also interstitial fluid flow [52-54]. To characterize this extra-cellular complication, the  
142 concentration profiles of a chemical cue in the presence of the flow on the microfluidic platform  
143 were measured and predicted by using FITC-conjugated dextran in **Figure 2**. The intensity  
144 measurement was considered as concentration of the FITC-dextran. Without flow, the  
145 concentration gradient of a chemical cue is a linear profile (**Figure 2A**). When the interstitial  
146 fluid flow of  $1.5\mu\text{m/s}$  was imposed along the chemical cue (i.e., parallel flow configuration in  
147 **Figure 2B**), the gradient becomes shallow in the region of interest (ROI) except the edge region  
148 ( $x \sim 250 \text{ }\mu\text{m}$ ). Since the parallel flow augments the advection of the molecules along the  
149 chemical cue gradient, the overall concentration value increases (**Figure 2B**). On the contrary,  
150 the counter flow suppresses the chemical cue gradient and lower the overall chemical cue  
151 concentration. Near the edge of source side ( $x \sim 750 \text{ }\mu\text{m}$ ), the gradient grows and becomes steep  
152 (**Figure 2C**). This result demonstrates that the concentration gradient of chemical cues in the  
153 microenvironment is significantly altered by the presence of the interstitial flow. Considering the  
154 interstitial flow can also regulate the directed cell migration as a fluidic cue, cells under chemical  
155 and fluidic cues need to process much more complex extra- and intra-cellular signals.

156 Then, we analyzed the complication of the integrated chemical and fluidic cues asking if  
157 the non-linear cue profiles fulfill the physical detection limit for chemical cue. The physical  
158 detection limit for chemical cue is a cellular capacity physically governed for a shallow chemical  
159 gradient [55,56]. Although the exponential profiles (either parallel or counter flow) provided a  
160 steep gradient near the source or sink, most of cells were located in the area where a relatively

161 shallow gradient is present. The physical detection limit was roughly determined with a relative  
162 gradient of the chemical concentration across the cell body ( $\gamma$ ) as follows [47,55,57] :

$$163 \quad \gamma[\%] = \frac{ga'}{\bar{c}} \quad (2)$$

164 where  $g$  [nM/mm] indicates a gradient strength,  $a'$  is the estimated cell length, and  $\bar{c}$  is  
165 an average concentration (See Materials and Methods and **Figure S2**). We determined the  
166 cellular detection precision with  $\gamma \sim 1\%$  as a physical detection limit, as the cells may not be  
167 capable of sensing the chemical gradient below this limit based on knowledge of the sensory  
168 precision threshold for *Dictyostelium* [58,59] and cancer cells [18,47]. Here, we defined the cue  
169 directions as forward (+ state), backward (− state), and no-cue (0-state). If a gradient is present  
170 but below the detection limit for the cells ( $\gamma < 1\%$ ), the gradient is neglected by the cells.  
171 Consequently, it is also considered as a *0-state*, indicating that there is no gradient which cells  
172 can sense.

173 In the no-flow condition (**Figure 2D**), all regions were above the physical detection limit,  
174 indicating that the cells are capable of sensing the chemical gradient. On the other hand, both  
175 parallel and counter flow conditions presented in **Figure 2E and F** display '*0-state*' regions  
176 where the relative gradient is below the cells' physical detection limit, leading to differential  
177 signal environment in two ways. For the parallel flow, the  $\gamma$  value drops down as the location is  
178 close to source channel and gets to the detection limit ( $\gamma \sim 1\%$ ) in the middle of ROI shown in  
179 **Figure 2E**. Consequently, it divides the region into two where the chemical cue is detectable  
180 (chem + state) and not detectable (chem *0-state*). When the chemical cue is detectable, cells are  
181 exposed by additive combination of the chemical gradient and the flow. Interestingly, *0-state* in  
182 parallel flow, the background concentration of chemoattractant is close to 10nM. We anticipate

183 that it is equivalent to the situation of cells exposed to a uniform chemoattractant with flow. On  
184 the other hand,  $\gamma$  for the counter flow increases as it is close to source channel while the  
185 detection limit ( $\gamma \sim 1\%$ ) is in the middle of ROI (**Figure 2F**). At the location where the  
186 chemical cue is detectable, the combination of the chemical and fluidic cues is competitive,  
187 having opposite direction (Chem +/Flow - state). Unlike the parallel flow, the counter flow  
188 washes the chemoattractant mostly away from the ROI showing the background concentration as  
189 close to 0nM where the chemical cue is below the detection limit in **Figure 2F**.

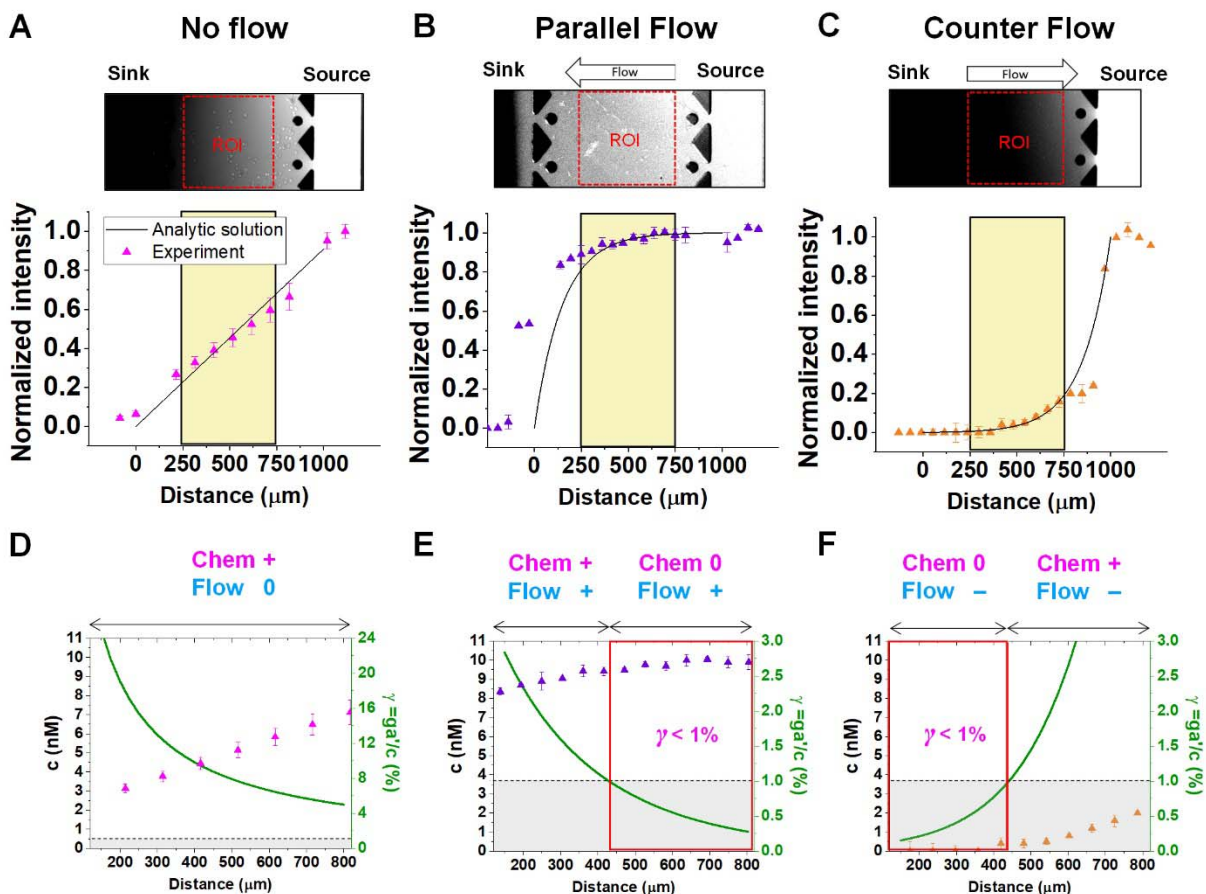

190  
 191 **Figure 2. Extracellular complications of the integrated chemical and fluidic cues with**  
 192 **cellular detection limit.** Concentration profiles of a chemical cue with (A) no flow (magenta),  
 193 (B) parallel flow (purple), and (C) counter flow (orange) is simulated by 10kDa FITC-dextran.  
 194 Concentration data points were measured from fluorescence intensity of FITC-dextran across y-  
 195 axis (mean  $\pm$  S.D.). Solid lines represent analytic prediction. The yellow region indicates Region  
 196 of Interest (ROI) where cell trajectories are analyzed excluding any edge effect of the  
 197 microfluidic platform. A relative gradient of the chemical concentration across the cell body ( $\gamma$ ,  
 198 green) was calculated based on the corresponding concentration profiles of (D) no flow, (E)  
 199 parallel flow, and (F) counter flow of ROI. The signal state of the chemical cue (Chem, magenta)  
 200 was defined as detectable when  $\gamma > 1\%$  whereas not detectable when  $\gamma < 1\%$ . The fluidic cue is

201 represented as Flow (dark cyan). A dot represents mean  $\pm$ S.D. Red box represents *0-state*  
202 indicating that negligibly shallow gradient which cells are not capable of sensing.

## 203 **Intra-cellular processing of two cues simultaneously**

204 **Figure 3** shows the directed migration behaviors of KIC cells under integrated chemical  
205 and fluidic cues. The cells' migration trajectories and the angular distribution of corresponding  
206 displacement are presented in **Figure 3A and B**. The results are divided into sub-regions  
207 considering the signal states of (TGF- $\beta$  gradient/flow). For parallel flow (**Figure 3A**), the  
208 trajectories and angle ( $\theta$ ) are distributed biased features toward the chemical cue direction in the  
209 sub-region of the additively integrated chemical and fluidic cues (+/+), whereas the trajectories  
210 and their angles in the other sub-region of 0/+ are randomly distributed. For the counter flow  
211 presented in **Figure 3B**, the trajectories and angular distribution are biased toward the chemical  
212 cue direction in the sub-region of the competitively integrated cues (+/-) whereas those are  
213 biased toward the flow direction in the other sub-region of 0/-.

214 Resulting directional accuracy is further analyzed with directional accuracy index (DAI)  
215 of all experimental cases in **Figure 3C**. DAI of the cell trajectories under a single cue either  
216 TGF- $\beta$  gradient (**Figure 3C, magenta**) or flow (**Figure 3C, dark cyan**) are biased toward each  
217 cue direction whereas control DAIs (**Figure 3C, grey**) show a distribution with median close to 0.  
218 In the parallel flow, the directional accuracy is significantly enhanced toward the chemical cue  
219 direction in +/+ as shown in **Figure 3C (purple, left)**. Indeed, the DAI distribution is highly  
220 biased toward 1, with a median as 0.62 in this case. Although the gradient strength is ~10%  
221 shallower than a linear TGF- $\beta$  gradient, directional accuracy under +/+ state is still significantly  
222 biased toward the cue direction comparable to the linear gradient (median DAI=0.46). On the  
223 other hand, cells lose their directional accuracy completely under 0/+ state where 0-state for the  
224 TGF- $\beta$  gradient despite the flow presence shown in **Figure 3C (purple, right)**.

225           The TGF- $\beta$  gradient and the counter flow compete in their directions when stimulating  
226 the cells. Here, we define reference direction for DAI as TGF- $\beta$  gradient direction, resulting in a  
227 negative sign for the directed migration stimulated by the flow. Cells under the counter flow in  
228 the region with the TGF- $\beta$  gradient above the limit (+/-) show bias in their DAI distribution  
229 toward 1, showing a median DAI = 0.53 (**Figure 3C, orange, left**). Although the counter flow  
230 direction is the opposite of the TGF- $\beta$  gradient, cells remain significantly biased toward the  
231 TGF- $\beta$  gradient. On the other hand, cells under the counter flow with *0-state* of TGF- $\beta$  gradient  
232 (0/-) have biased distribution of DAI toward -1 with a median as -0.28 (**Figure 3C, orange,**  
233 **right**). It implies that cells are not capable of sensing the shallow chemical gradient in the 0-state  
234 region, consequently, they respond only to the flow.

235           We summarize the median DAI from distributions of each signal state in the heat map  
236 (**Figure 3D**) to show how each signal state induces the directional accuracy. The signal states  
237 with negative chemical cue direction (-/+, -/0, and -/-) are simply reflected by the signal states  
238 (+/-, and +/0, and +/+, respectively). The heat map shows two distinct features. Regardless of  
239 the fluidic cue, cells seem to follow the chemical cue direction when the chemical cue is not 0-  
240 *state*. Indeed, the cells seem to neglect the flow when they are exposed to a competing  
241 combination of TGF- $\beta$  gradient and the counter flow. If the cellular response simply follows the  
242 signal state hypothesizing that the chemical and fluidic cues have comparable level in cellular  
243 processing machinery, the signal state of (+/-) would be anticipated as an antagonism showing  
244 lower DAI than TGF- $\beta$  gradient only, but this was not shown in our results. Also, the 0/+ state  
245 can be represented in two distinct ways: flow only (dark cyan) and 0/+ state of chemical cue with  
246 parallel flow under the integrated chemical and fluidic cues (purple) (**Figure 3D**). The median  
247 DAI under the flow only was 0.37, which was significantly biased toward the upstream direction



248 of the flow. However, cells under for 0/+ of the integrated chemical and fluidic cues lose their  
249 bias completely with the median DAI = 0.09, indicating the cells do not respond to the flow  
250 stimulation. Unlike cells in 0/+, the cells in *0-state* with counter flow (0/-) were induced by the  
251 flow. Thus, a quantitative comparison of effectiveness between chemical and the fluidic cues is  
252 required to address the results. Since the *0-state* with parallel flow includes the high background  
253 concentration of TGF- $\beta$ , we hypothesize that cells are receiving strong information about an  
254 ungraded chemical cue, and this overpowers the weaker fluidic cue.

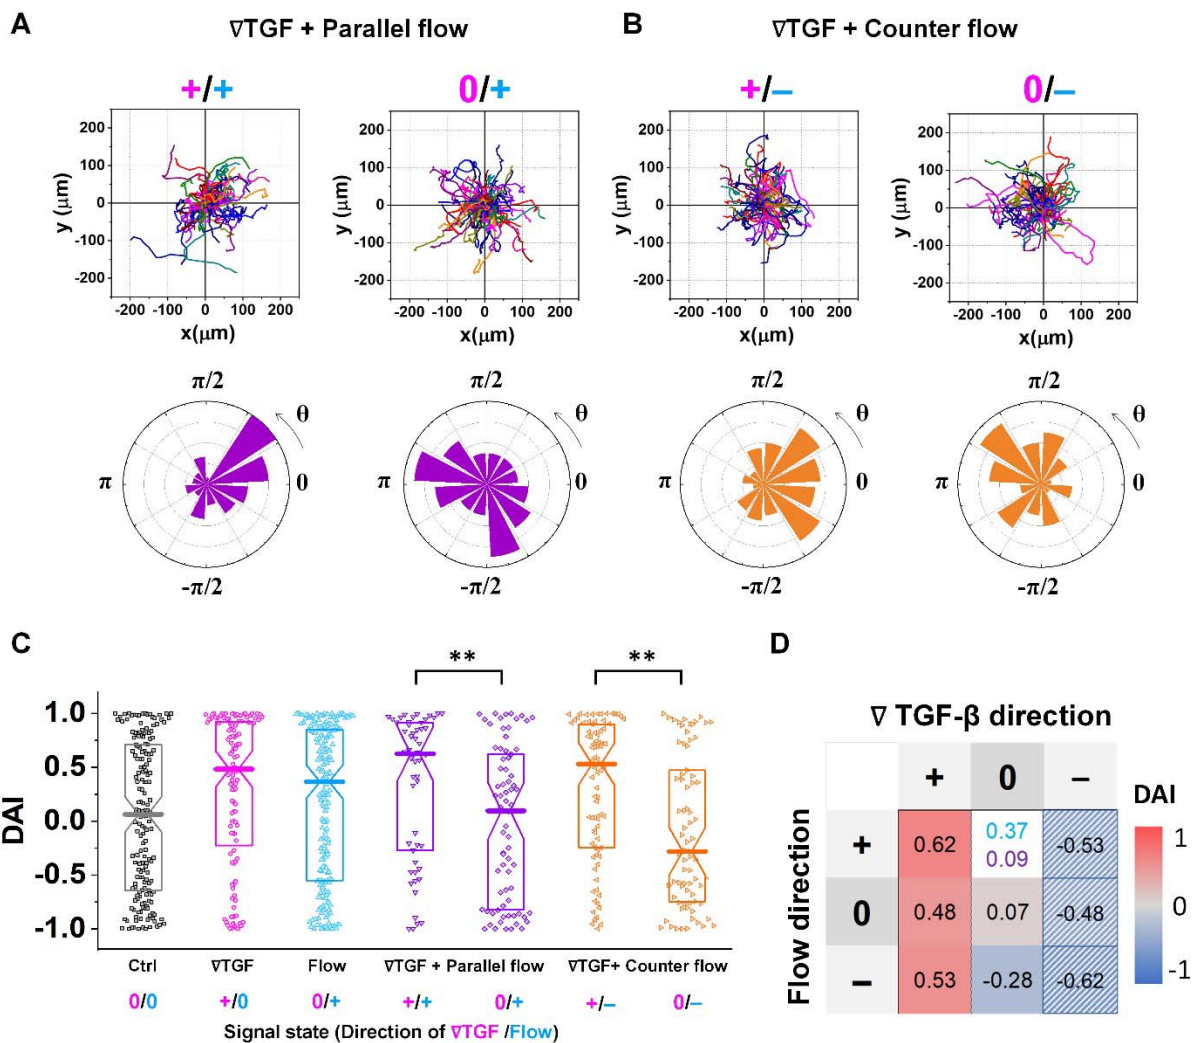

255

256 **Figure 3. Differential response in directional accuracy of KIC to the integrated cue.** Cell

257 migration trajectories and angular distribution ( $\theta$ ) of collected trajectories of KICs under (A)

258 TGF- $\beta$  gradient ( $C_{\text{source}}=10\text{nM}$  and  $C_{\text{sink}}=0\text{nM}$ ) with the parallel flow ( $\nabla$ TGF + Parallel flow,

259 purple), and (B) TGF- $\beta$  gradient with the counter flow ( $\nabla$ TGF + Counter flow, orange). (C) DAI

260 distributions of all collected trajectories of KICs with respect to each signal state of  $\nabla$ TGF

261 (magenta) / Flow direction (dark cyan). Box: quartiles with a median line in the middle of the

262 box. Dot; a DAI from a single trajectory.; Cell trajectories  $N>50$ . \*\*:  $p<.01$ , (Mann-Whitney test)

- 263 (D) Heat map for medians of DAI distributions of all experimental conditions. The hatched area:  
264 reflected from the opposite signal state.

## 265 **A shared pathway model successfully predicts the cellular response to integrated cues**

266 To further understand the cell's integrated response to both flow and chemical cues, we  
267 turn to mathematical modeling. We adapt a model that we previously introduced to describe a  
268 cell's integrated response to two chemical signals [38] that relies on the convergence of the two  
269 response pathways at a common intracellular component. Specifically, here we suppose that  
270 TGF- $\beta$  induces the production an internal chemical species X, whereas flow induces (e.g., via  
271 pressure-sensitive receptors) the production of a second internal species Y (**Figure 4A**). X and Y  
272 converge to jointly catalyze the conversion of a third species A into an activated state B, which is  
273 responsible for initiating the migration machinery downstream, described in the model as species  
274 M. The net result is that a rightward TGF- $\beta$  gradient, or a leftward flow (corresponding to a  
275 rightward pressure gradient), produces more M molecules on the right side than on the left side  
276 of the cell, inducing rightward migration. Simplifying the cell to just these two halves, the rate  
277 equations corresponding to the reaction network in **Figure 4A** give a steady-state molecule  
278 number difference of (see **Supplementary Information**)

$$279 \quad \Delta m = \eta \frac{\beta a' g + \phi_1}{(1 + \beta \bar{c} + \phi_2)^2} \quad (3)$$

280 where, as above,  $\bar{c}$  is the background TGF- $\beta$  concentration in the region of interest,  $g$  is its  
281 gradient, and  $a'$  is the cell length; and here  $\eta$ ,  $\beta$ ,  $\phi_1$ , and  $\phi_2$  are combinations of reaction rates  
282 (see **Supplementary Information**). Intuitively,  $\eta$  sets the overall molecule number scale,  $\beta$  is  
283 an amplification factor for the chemical signal, and  $\phi_1$  and  $\phi_2$  depend on the properties of the  
284 flow.

285 To describe the resulting migration, we use a biased random walk model [47] to relate the  
286 migration angle  $\theta$  to the molecule number difference  $\Delta m$ ,

$$287 \quad p(\theta) = \frac{1-\alpha}{2\pi} + \frac{\alpha e^{-(\Delta m)\cos\theta}}{2\pi I_0(\Delta m)} \quad (4)$$

288 Here  $p(\theta)$  is the probability distribution of migration angles (**Figure 1B**), the first term  
289 corresponds to purely random motion over the angular range 0 to  $2\pi$ , and the second term  
290 corresponds to directed migration toward  $\theta=0$ . Intuitively, as  $\Delta m$  increases, the second term  
291 becomes more sharply peaked, corresponding to higher directional precision. The parameter  $\alpha$   
292 determines the balance between the random ( $\alpha=0$ ) and directed ( $\alpha=1$ ) components, and  $I_0$  is  
293 the modified Bessel function of the first kind (required for normalization).

294 The median of  $\cos\theta$  values drawn from  $p(\theta)$  gives the DAI from the model in terms  
295 of the parameters  $\bar{c}$ ,  $g$ ,  $a'$ ,  $\eta$ ,  $\beta$ ,  $\phi_1$ ,  $\phi_2$  and  $\alpha$ . We compare the model with the experiments in  
296 two steps. First, we calibrate the model parameters using the experimental data. Specifically, we  
297 set  $\bar{c}$ ,  $g$ , and  $a'$  directly from the experiments as above; we set the four parameters  $\eta$ ,  $\beta$ ,  $\phi_1$ ,  
298 and  $\phi_2$  using the median DAI in the four experimental conditions (TGF- $\beta$  gradient only, flow  
299 only, parallel flow, and counter flow); and we set the last parameter  $\alpha$  using the maximum mean  
300 DAI observed across all of these experimental conditions (see **Supplementary Information**).  
301 We see in **Figure 4B** that the model is able to capture the median DAI from experiments well.  
302 Second, we use the calibrated model parameters, with no further fitting, to predict the median  
303 DAI when the parallel and counter flow conditions are separated based on the detection limit as

304 above. We see in **Figure 4C** that the model prediction agrees well with the observed median  
305 DAI values, even without further fitting.

306 Beyond validating the experiments, the model offers an intuitive explanation for the cell  
307 responses. When the TGF- $\beta$  and flow signals are coherent (parallel flow), and above the TGF- $\beta$   
308 gradient detection limit, the DAI is large, as expected (**Figure 4C, left purple**). Below the  
309 detection limit, one might expect that flow should dominate, and the DAI would still be positive.  
310 However, the large TGF- $\beta$  background concentration in this regime (**Figure 2E** and large  $\bar{c}$  in  
311 **Eq. 3**) saturates the signaling network, leading to a small  $\Delta m$  and thus a small DAI (**Figure 4C,**  
312 **purple right**). When the TGF- $\beta$  and flow cues are incoherent (counter flow), and above the  
313 TGF- $\beta$  gradient detection limit, the DAI is large and positive (**Figure 4C, orange left**),  
314 indicating that chemical detection overpowers flow detection. Indeed, in the model we find that  
315  $\phi_1 / \phi_2$ , which is the analog of  $a'g / \bar{c}$  for flow sensing (**see Supplementary Information**) is  
316 0.1%, which is always less than  $a'g / \bar{c}$  in regimes where it is above its detection limit of 1%.  
317 Finally, below the chemical detection limit, the DAI is negative (**Figure 4C, orange right**), i.e.,  
318 aligned with the flow, because here the TGF- $\beta$  background concentration is negligible, allowing  
319 flow to dominate.

320 To confirm a key prediction of the model, namely that the large TGF- $\beta$  background  
321 concentration is responsible for the suppression of flow sensing in the parallel flow regime below  
322 the chemical detection limit (**Figure 3C, right purple**), we perform further experiments.  
323 Specifically, we combine flow with a uniform TGF- $\beta$  concentration at either 5 or 10nM. At 5nM,  
324 which is roughly half of the background level in this regime (**Figure 2E**), we see that the DAI is  
325 not suppressed (**Figure 4D**). However, at 10nM, which is roughly equal to the background level  
326 in this regime, we see that the DAI is indeed suppressed (**Figure 4D**).

327

328

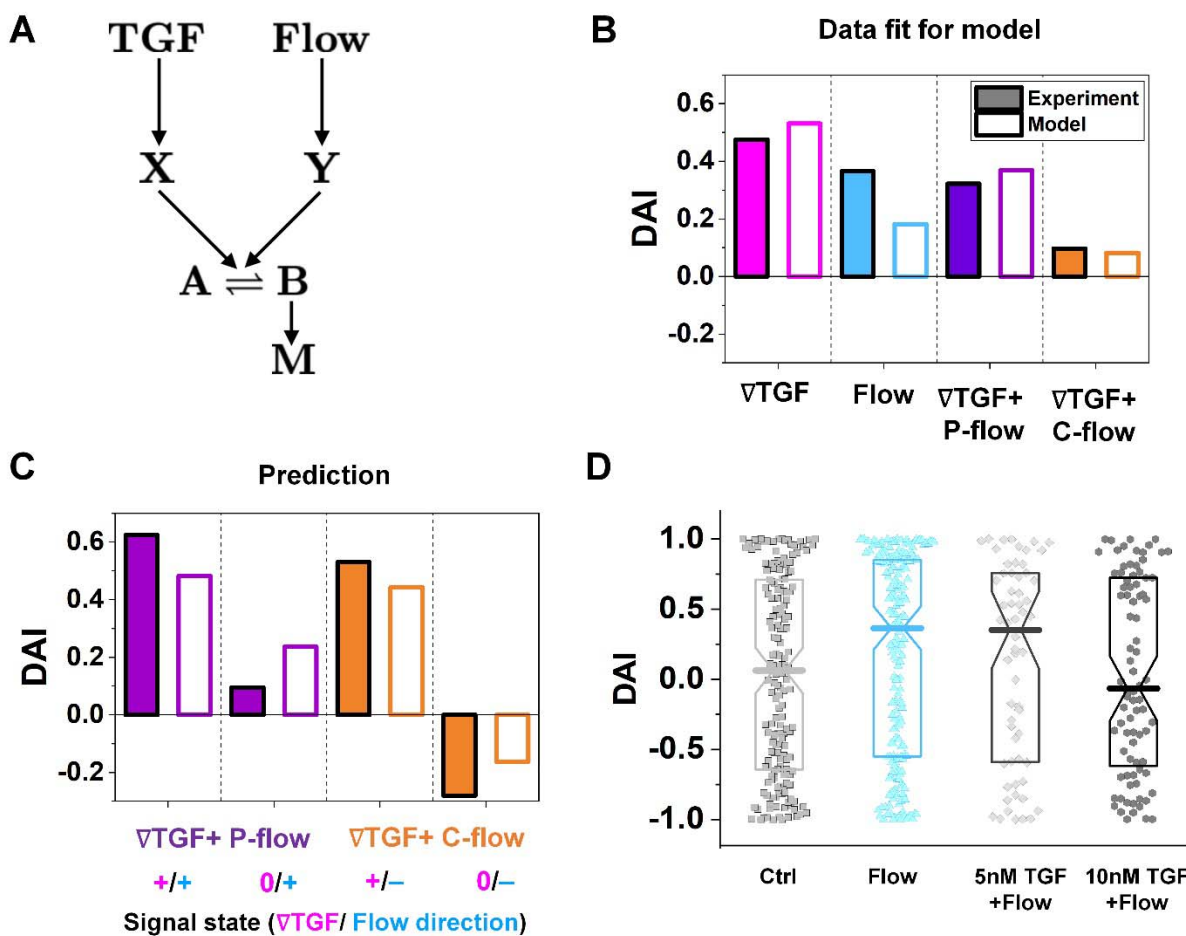

329

330 **Figure 4. The shared pathway model addressing experiment findings under the integrated**  
 331 **chemical and fluidic cues.** (A) Simple molecular network used to explain the experimental data.  
 332 (B) Fit of the experimental data using our model. (C) Prediction by our model and validation by  
 333 experiments. (D) DAI distribution of KIC cells migrating in response to flow and background  
 334 TGF- $\beta$  present together. Box: quartiles with a median line in the middle of the box. Dot; a DAI  
 335 from a single trajectory.; Cell trajectories N>50.

336

337

338



### 339 Cellular signal processing machinery can be modeled as a ternary logic gate

340 We construct a logic gate model to reconstitute the function of the cellular signal  
341 processing machinery (**Figure 5**). The cellular response to the cues (+, 0, or -) presents three  
342 variables as outputs, allowing us to develop a ternary logic system. For consistency, we define  
343 the output direction based on the chemical cue. When the cell migration direction is aligned to  
344 the chemical cue direction with positive DAIs, cell direction can be represented as a forward (+  
345 *state*). On the other hand, the repulsive response to the cue with negative DAI can be denoted as  
346 - *state*. Cells' random movement not showing any bias in their direction with DAI close to 0 are  
347 defined as *0-state*. In this way, the heat map presented in **Figure 3D** can be converted to a  
348 ternary logic table. We convert the positive or negative DAIs to + or - respectively when the  
349 DAI distribution fulfills the statistical significance ( $p < 0.05$ ) in their comparison with control  
350 (**Figure 5A**). The DAIs close to 0 with no significant bias in their distribution is converted to 0.  
351 We present two separate ternary logic tables based on the system saturation caused by the high  
352 background TGF- $\beta$  concentration resulting in suppression of the directional accuracy as we  
353 presented in the prior section. By separating the results depending on the system saturation, the  
354 present inconsistency presented in 0/+ (**Figure 3D**) is resolved.

355 The ternary logic gate is composed of the five ternary operators, whose operating  
356 functions are presented in **Figure 5B**. The monadic operator “=0” returns 0 input to + output  
357 whereas + and - input to 0 output. Another monadic operator “ $\times 0$ ” returns all zero regardless of  
358 the input states. We also used diadic operators represented as  $\otimes$  and  $\oplus$ , which simply multiply  
359 and add two inputs to return the corresponding outputs respectively. To stop misguided  
360 migration when the machinery capability is saturated, we apply a circuit breaker for the system  
361 saturation with a multiplexer. The multiplexer switches the circuit path based on an additional

362 intracellular input  $S$ . We apply two intracellular inputs;  $S=1$  where the system is saturated by  
363 high background TGF- $\beta$  concentration, and  $S=0$  where the system is not saturated. By using the  
364 basic operators, the ternary logic circuit to address the ternary logic tables is developed in **Figure**  
365 **5C**. When the system is not saturated ( $S=0$ ), the cells tend to decide their direction dominantly  
366 following TGF- $\beta$  gradient, regardless of the flow's existence. The path for  $S=0$  mimics an  
367 absorption logic gate which selectively choose one particular input to decide their output. In  
368 contrast, the path for  $S=1$  for system saturation leads to returning all zero. Consequently, the  
369 circuit successfully represents the experimental results. The ternary logic gate in **Figure 5C**  
370 implies a corresponding mathematical expression in terms of ternary variables ( $-$ ,  $0$ , or  $+$ ) which,  
371 self-consistently, agrees with our expression for  $\Delta m$  (**Eq. 3**) when looking only at its sign ( $-$ ,  $0$ ,  
372 or  $+$ ); see **Figure S3**.

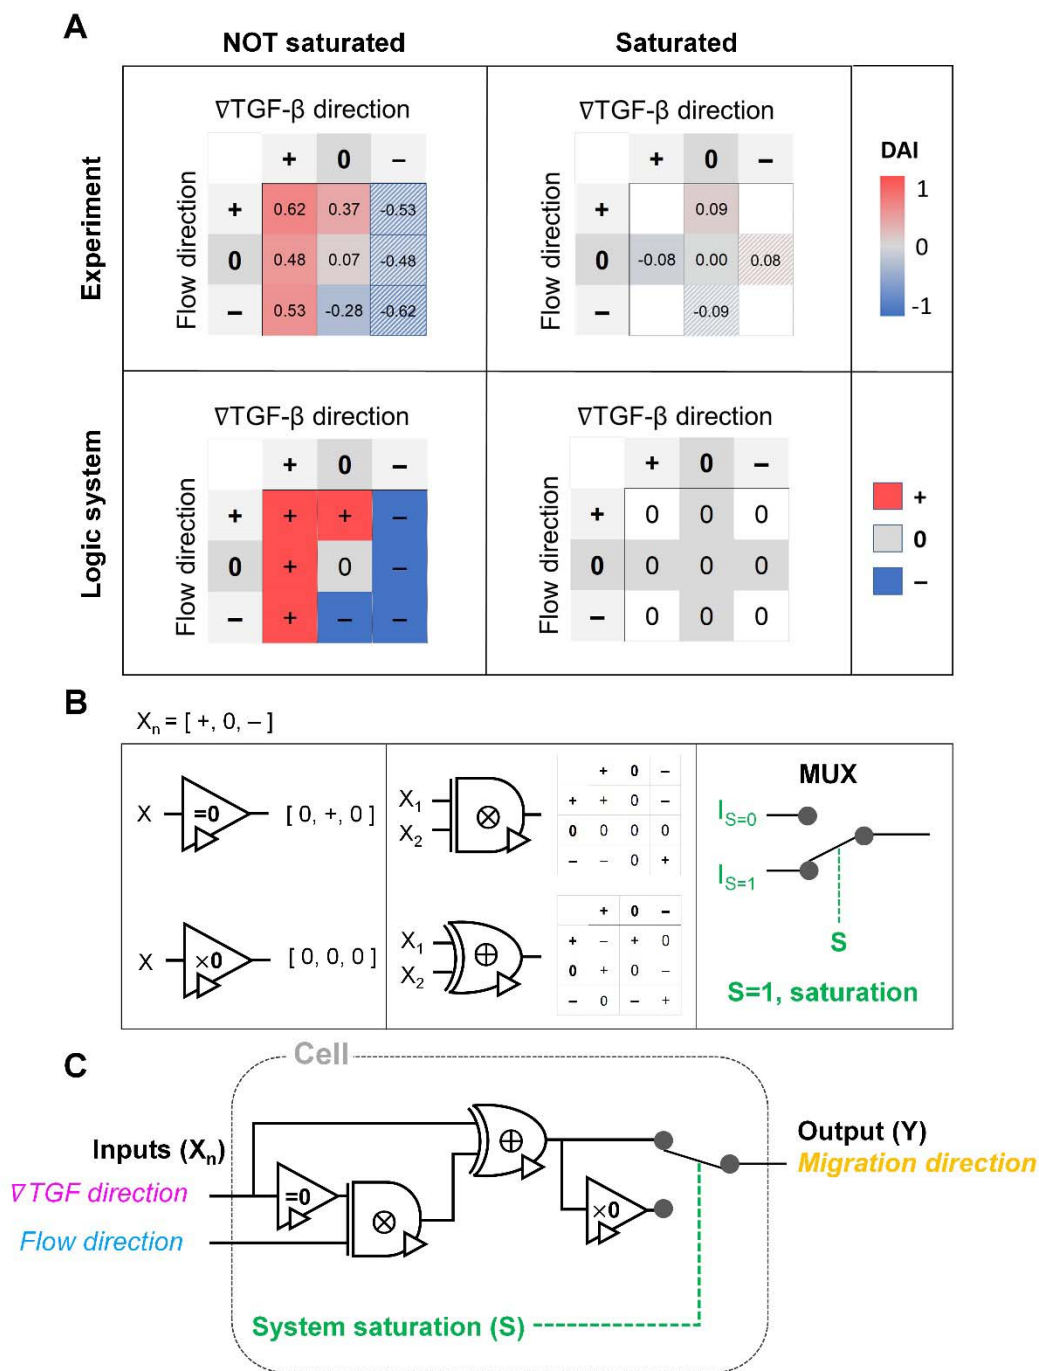

373

374 **Figure 5. Ternary logic gate model to address the cellular signal processing machinery. (A)**

375 Heat map for experimental results of DAI medians of not saturated (left) and saturated (right)

376 cases. The system saturation is considered with experimental groups of the higher TGF- $\beta$

377 background noise (TGF=10nM). It is converted to the truth tables of ternary logic system with

- 378 signal states (+, 0, and –); the hatched area: reflected from the opposite signal state. (B) Ternary  
379 operators and their functions used in the model. (C) The proposed ternary logic gate model.

## 380 Discussion

381 The present results show the complexity in the extracellular signal environment,  
382 specifically caused by the integrated chemical and fluidic cues. We investigated signaling  
383 environment where Péclet number ( $Pe$ )  $\sim 1$  in cases that flow runs parallel or counter to a TGF- $\beta$   
384 gradient. As the fluidic cue becomes stronger (i.e, a higher  $Pe$  environment ( $Pe \gg 1$ )), the  
385 transport of TGF- $\beta$  becomes convection-dominant, whereas weaker fluidic cues (i.e., lower  $Pe$   
386 ( $Pe \ll 1$ )) corresponds to diffusion-dominant transport. Corresponding changes of the gradient  
387 of chemical cue depending on the flow direction and  $Pe$  are shown in **Figure S4**. In fact,  $Pe$   
388 varies from 0.1 to 2 with slow interstitial flow rates in various tissue interstitium, including  
389 cancer [52-54]. The combination of the TGF- $\beta$  gradient and the flow displays two important  
390 aspects. First, the TGF- $\beta$  concentration profiles are non-linear exponentials, where the cells  
391 experience spatially differential gradient strengths, including a shallow gradient region close to  
392 the cellular sensing limit. The exponential profiles of the concentration could be either shallow  
393 or steep where the background concentration could be higher or lower depending on the direction  
394 of flow and chemical gradient, causing a spatially differential response of cells [47,57,58].  
395 Second, cells are exposed to integrated cues of the chemical gradient and the flow as either  
396 additive or competitive depending on the flow direction, increasing the complexity of the cellular  
397 sensing and processing machinery both intrinsically and extrinsically.

398 The present results streamline the complexity by implicating cellular sensing capability for  
399 the chemical cue. The spatially varied gradient is developed by imposing convection in the  
400 microenvironment, including shallow gradient regions below the cellular detection limit [55].  
401 Indeed, the physical limit of cells in sensing chemical gradient allowed us to decouple the  
402 integrated chemical and fluidic cues into the fluidic cue only, indicating 0-state. Consequently,

403 the cells ruled out the effect of the TGF- $\beta$  gradient in their decision-making for migration  
404 direction where it was below the detection limit.

405 Besides, we demonstrate the cellular response to the combination of chemical and fluidic  
406 cues. The flow impacts the cellular behaviors as a transport medium and as a fluidic cue to  
407 induce migration potential of various cell types, including immune cells and cancer [13,60,61].  
408 In the presented experiment results, we have observed that cells effectively select a cue to follow  
409 in processing the mixed chemical and fluidic cues. When cells are capable of sensing both  
410 chemical and fluidic cues, cells tend to follow a chemical gradient direction in both the additive  
411 combination with the parallel flow and the competing with the counter flow, as shown in **Figure**  
412 **3**. The cells were biased toward the upstream direction of the fluidic cue, only when the chemical  
413 gradient was too shallow for cells to detect it. (**Figure 3 orange right**). The effect of the  
414 chemical gradient is ruled out. Most strikingly, the cellular biased response was completely ruled  
415 out when the processing capacity is saturated. Based on the experimental observation, we  
416 propose the framework of the cellular sensing machinery by using the ternary logic gate model in  
417 **Figure 5**.

418 The present results demonstrated the physical implication of cells' innate capability of  
419 processing the integrated cues. The cellular sensory machinery incorporates that the complex  
420 signal transduction manipulates the cellular functions after sensing the cues. Previously, we have  
421 shown that saturation of the intracellular signal transduction capacity causes antagonism in their  
422 chemotaxis, where the two different chemical cues not sharing their receptors induce cell  
423 directed migration [38]. A recent study also demonstrated that the limited source of intracellular  
424 translational or transcriptional factors results in poor performance and predictability in synthetic  
425 biology [62]. Although it is still poorly understood how flow activates cell mechanotransduction,

426 recent studies have begun exploring the signaling cascades of the flow cue [4,14,19].  
427 Interestingly, the downstream networks of the flow cue overlap with the chemotaxis signaling  
428 transduction that regulates actin cytoskeletal dynamics, which are thought to manipulate the cell  
429 bias movement [14]. In this sense, our results demonstrate that the saturation of the shared  
430 pathway to manipulate cellular migration direction completely removes cells' bias movement,  
431 indicating that the cellular processing capacity could limit the cellular performance.

432 The present study laid a framework for understanding how cells decode chemical and  
433 fluidic cues to determine migration direction by proposing a ternary gate circuit. Cellular  
434 decision-making is a systematic result from sensing to deciphering the cues with complex  
435 downstream signal processing. Our results suggest a simple circuit to address the complex  
436 process based on our observation showing the cellular innate sensing and processing capacity  
437 [38]. The proposed framework of the gate circuit implies the potential use of the ternary system  
438 to model cellular sensory machinery for environmental cues with heterogeneous origins. The  
439 proposed ternary logic gate may provide a blueprint to synthesize functional signal processing  
440 machinery for engineered cells. Recent advances in synthetic biology to engineer genetic circuits  
441 of the cells offer great potential in developing engineered cellular systems as sensors,  
442 therapeutics, and delivery vehicles [31,63-65]. The microbials (e.g., *Escherichia coli* and virus)  
443 have been engineered to target pathogenic sites for diagnosis and therapeutics [66,67]. Recent  
444 development in synthetic mammalian cells pursued the immune cell (T-cell) chemotaxis [30] and  
445 anti-cancer targeting purposes [68,69]. Nonetheless, it is required to have an effective genetic  
446 circuit design to regulate the directed migration of the delivery vehicles based on a profound  
447 understanding of cellular sensory machinery with both extrinsic and intrinsic considerations.

448 Accordingly, the proposed ternary gate model provides insight to develop potential targeting  
449 vehicles in various ways.

450

#### 451 **Limitations of the study**

452 Although the present study demonstrates how cells decipher integrated chemical and fluidic cues,  
453 the type of environmental cues for the investigation is limited. Multiple chemoattractants may  
454 induce directed cell migration besides TGF- $\beta$ . Besides the chemical or fluidic cues, mechanical  
455 cues such as matrix stiffness gradient can also affect migration. The present study used one cell  
456 type, but further validation using multiple cell types is warranted.



457 **Acknowledgments**

458 This work was partially supported by grants from the National Institutes of Health (U01  
459 HL143403, R01 CA254110, R61 HL 159948, and P30 CA023168) and National Science  
460 Foundation (MCB-2134603, MCB-1936761, and PHY-1945018).

461 **Author contributions**

462 BH conceived the idea. HM primarily performed the research and acquired the data. SS and AM  
463 performed the research and acquired the data for the shared pathway model. All authors  
464 discussed the results.

465 **Declaration of interests**

466 The authors declare no competing interests.

467 **Inclusion and diversity**

468 We worked to ensure diversity in experimental samples through the selection of the cell lines.  
469 The author list of this paper includes contributors from the location where the research was  
470 conducted who participated in the data collection, design, analysis, and/or interpretation of the  
471 work.

## 472 **Materials and methods**

### 473 **Cell cultures and reagents**

474 KIC is a murine pancreatic cancer cell line isolated from genetically engineered mouse model for  
475 pancreatic adenocarcinoma in which *Kras* was combined with deletion of the *Ink4a* locus  
476 (*Ink4a/Arf<sup>L/L</sup>*). [70-72] The KIC cells showed mesenchymal phenotype in response to TGF- $\beta$ ,  
477 whose invasion potential increased and directed migration was induced [38,48]. These cells were  
478 cultured in RPMI 1640 with 2.05mM L-glutamine (GE Healthcare Bio-Sciences Corp., MA,  
479 USA) supplemented by 5% v/v fetal bovine serum (FBS) and 100  $\mu\text{g ml}^{-1}$   
480 penicillin/streptomycin (P/S). The cells were regularly harvested by 0.05% trypsin and 0.53mM  
481 EDTA (Life technologies, CA, USA) when grown to ~80% confluency in 25  $\text{cm}^2$  T-flasks and  
482 incubated at 37°C with 5%  $\text{CO}_2$ . Harvested cells were used for experiments, or sub-cultured  
483 while maintaining them below 15<sup>th</sup> passage.

484

### 485 **Convection-driven signal environment in a microfluidic platform**

486 In this study, we use the *in vitro* microfluidic platform to engineer microenvironment  
487 involving both chemical and pressure variances. The *in vitro* microfluidic device is composed of  
488 center, source, and sink channels [38,47]. We manipulate concentration of transforming growth  
489 factor beta-1 (TGF- $\beta$ , Invitrogen, CA, USA) between source and sink channels to develop  
490 chemical gradients in the center channel. Meanwhile, we engineer the pressure variance between  
491 source and sink channels so that the pressure driven flow is generated in the center channel. The  
492 concentration profile in the center channel could be determined by its diffusion and advection  
493 shown in the governing equation (**Eq.1**). To apply the interstitial flow in a presence of TGF- $\beta$

494 gradient, we always filled the source channel with 10nM of TGF- $\beta$  while the sink channel was  
495 filled with normal culture medium. The concentration profile of TGF- $\beta$  was analyzed with  
496 simple mathematical approach through the governing equation (Eq.1) and corresponding  
497 boundary conditions, providing structural intuition of the gradient features. We simplified the  
498 device geometry as a 1-D, used constant parameters of diffusivity ( $D_{eff}$ ) and flow velocity  
499 ( $v_f = U$ ), and evaluated the steady state ( $\frac{\partial C_i}{\partial t} = 0$ ).

$$500 \quad C_i(x) = \frac{\exp(Ux / D_{eff}) - 1}{\exp(UL / D_{eff}) - 1}$$

501 Consequently, the concentration is an exponential profile. Exponential non-linear  
502 gradient profiles are expected to be developed at the steady state with uniform concentration at  
503 the boundaries.

504 In the center channel of the microfluidic platform, KIC cells were uniformly implanted in  
505 2mg/ml type I collagen mixture (Corning Inc., NY, USA) supplemented with 10X PBS, NaOH,  
506 HEPES solution, FBS, Glu, P/S, and cell-culture level distilled water. Initial cell density was  
507  $8 \times 10^5$  cells/ml consistently for all groups. After loading, the cells in the collagen matrix were  
508 cultured with basic mediums for 24 hours. Then, cells were exposed by engineered signal  
509 environment accordingly.

### 510 **Pressure driven flow in the microfluidic platform**

511 We controlled the low Reynolds flow through the collagen matrix (0.5–3 $\mu$ m/s) that  
512 corresponded to the interstitial flow rate of the tumor microenvironment. [52,53]. In controlling  
513 the flow rate inside the collagen matrix, we considered the Brinkman equation:

514 
$$\nabla p_i = -\frac{\mu}{K} \bar{v}_f + \mu \nabla^2 \bar{v}_f \quad (5)$$

515 where  $\bar{v}_f$  is the average flow velocity,  $\mu$  is a dynamic viscosity, and K is the  
516 permeability of the culture medium in a type I collagen matrix of 2mg/ml. [53,73] In the  
517 literature, the permeability K in a type I collagen matrix of 2mg/ml has been reported to range  
518 from  $10^{-14}$ – $10^{-13}$  m<sup>2</sup>. [74-76]. Based on that, we averaged the value range of reported  
519 permeability K, calculated as  $K = 5 \times 10^{-14}$  m<sup>2</sup>. The pressure variance was applied between the  
520 source and sink channels by controlling the hydrostatic pressure levels of each reservoir,  
521 respectively. To control the flow velocity of ~1  $\mu\text{m/s}$ , we considered the pressure differences  $\Delta P$   
522 ( $P_{\text{source}} - P_{\text{sink}} = \sim 2\text{mmH}_2\text{O}$ ), adapting  $\nabla p \sim 19.6$  Pa/mm in the center channel. The hydrostatic  
523 pressure differences are controlled by applying the medium level differences between two  
524 channel reservoirs with a presence of drain flow. The drain flow was applied aiming to maintain  
525 the pressure difference between the channels consistently. Here, we assumed that the drain flow  
526 at the sink channel is not critically interrupted the interstitial flow at the center channel with  
527 relatively small area of the interface. The consistent drain flow at the sink channel ( $Q_{\text{drain}} = 10 \mu\text{l/h}$ )  
528 was applied considering potential pressure drop caused by the flow. The drain flow was achieved  
529 by connecting the sink channel with syringe pump (NE-1000-ES, New Era pump system, USA).

530 To verify the scale of the controlled flow rate, we measured fluorescent beads' (0.2 $\mu\text{m}$   
531 diameter) trajectories. The average  $\pm$  standard error of the collected particle velocities was  $1.5 \pm$   
532  $0.048$   $\mu\text{m/s}$  (**Figure S1**). By using the measured value of the flow velocity, the permeability K  
533 for 2mg/ml type I collagen matrix was calculated as  $8 \times 10^{-14}$  m<sup>2</sup> where  $\mu = 0.84\text{cP}$  for DMEM  
534 [53], which is within comparable scale with the reported permeability range of  $10^{-14}$ – $10^{-13}$   
535 m<sup>2</sup>[74-77].

## 536 **Characterization of the directed cell migration**

537 Live-cell time-lapse imaging with an inverted microscope (Olympus IX71, Japan) is  
538 utilized to characterize the cell migration. A stage top incubator allows maintaining the  
539 microfluidic platform at 37°C with 5% CO<sub>2</sub> condition during imaging as described in our  
540 previous studies. [47] Migrating eKIC cells were captured every 5 minutes for 3 hours. The time-  
541 lapse images are captured 3 hours after applying either chemical or pressure variances to give an  
542 adjustment time for stable environmental condition. The bright-field time lapse images are  
543 segmented to analyze cell trajectories by using ImageJ. A specific cell region is determined by  
544 the image contrasts which provides clear boundaries between cells and background. Then, cell  
545 centroids are collected in the converted monochrome images. A collection of the centroids of cell  
546 areas at different time points are defined as a cell trajectory. In collecting cell trajectories, we  
547 reject trajectories of cells under division and the stationary cells. This is because the dividing  
548 cells could affect for cell polarity [78] and the stationary cells could underestimate the cell  
549 movement characteristics. The stationary cells were defined when a cell's total trajectories were  
550 less than the estimated cell diameter.

551 The directed cell migration is characterized by motility and directional accuracy. [47]  
552 The direction of the cell trajectories is analyzed based on the direction of environmental signals.  
553 We measure directional accuracy using the directional accuracy index (DAI)

$$554 \quad DAI = \cos \theta$$

555 where  $\theta$  is the angle between the net displacement of a trajectory and the environmental cue  
556 direction. A straight line connecting the initial and final points of a trajectory indicates a  
557 displacement. For the chemotaxis, the direction of the environmental signal is along the

558 concentration gradient direction from low to high. When the interstitial flow is applied as an  
559 environmental signal, we compare the cell bias with the upstream direction of the flow along the  
560 flow streamline, considering the recent studies reporting that the cells were stimulated toward the  
561 upstream direction. [74] When both chemical gradient and interstitial flow are spontaneously  
562 applied, the reference direction of the signals is determined as the chemical gradient direction.  
563 The DAI range is between -1 and 1. DAI = 1 indicates that the cell is perfectly biased to the  
564 environmental signal direction, whereas DAI = 0 means that the cell is showing random motion.  
565 On the other hand, DAI=-1 indicates that the cell moves toward the completely opposite  
566 direction to the environmental signal. Thus, higher DAI indicates that the cell migration is  
567 accurately following the reference direction. Cells show distributed DAIs throughout the range  
568 of -1 to 1 due to the nature of cell response to the attractant. In the distribution, a median DAI  
569 represents a result from one experiment trial. More detailed description about DAI is stated in the  
570 previous studies[47]. Here, the cell path is measured from a trajectory taken every  $\Delta t = 5$  minutes,  
571 and total duration of the trajectories is three hours.

## 572 **Statistical analysis for experiments**

573 All experimental controls were repeated until the number of trajectories in each case > 50  
574 trajectories. A trajectory was evaluated with a quantified DAI and a speed. To compare the  
575 directional accuracy, the distribution of DAIs was reported in box plots with distribution of data  
576 points. A data point in the box plots indicates the metric of a cell trajectory. Median values of the  
577 distribution were statistically examined with Mann-Whitney nonparametric test where the  
578 statistical significance was evaluated when  $U < 0.05$  in **Figure 1D** and **Figure 3C**.

579

580 **References**

- 581 [1] B. de Lucas, L. M. Pérez, and B. G. Gálvez, *Journal of cellular and molecular medicine* **22**, 746  
582 (2018).
- 583 [2] K. Kohli, V. G. Pillarisetty, and T. S. Kim, *Cancer Gene Therapy*, 1 (2021).
- 584 [3] A. D. Luster, R. Alon, and U. H. von Andrian, *Nature immunology* **6**, 1182 (2005).
- 585 [4] M. J. Oudin and V. M. Weaver, *Cold Spring Harbor Symposia on Quantitative Biology*, 030817  
586 (2017).
- 587 [5] K. F. Swaney, C.-H. Huang, and P. N. Devreotes, *Annual Review of Biophysics* **39**, 265 (2010).
- 588 [6] T. Worbs, S. I. Hammerschmidt, and R. Förster, *Nature Reviews Immunology* **17**, 30 (2017).
- 589 [7] B. Ren, M. Cui, G. Yang, H. Wang, M. Feng, L. You, and Y. Zhao, *Molecular Cancer* **17**, 108  
590 (2018).
- 591 [8] M. A. Swartz, N. Iida, E. W. Roberts, S. Sangaletti, M. H. Wong, F. E. Yull, L. M. Coussens, and  
592 Y. A. DeClerck, *Cancer Research* **72**, 2473 (2012).
- 593 [9] A. Ozcelikkale, J. C. Dutton, F. Grinnell, and B. Han, *Journal of The Royal Society Interface* **14**,  
594 20170287 (2017).
- 595 [10] E. T. Roussos, J. S. Condeelis, and A. Patsialou, *Nature Reviews Cancer* **11**, 573 (2011).
- 596 [11] T. Miyagawa, H. Koteishi, Y. Kamimura, Y. Miyanaga, K. Takeshita, A. Nakagawa, and M.  
597 Ueda, *Nature communications* **9**, 1 (2018).
- 598 [12] M. A. Swartz and A. W. Lund, *Nature Reviews Cancer* **12**, 210 (2012).
- 599 [13] J. M. Munson and A. C. Shieh, *Cancer management and research* **6**, 317 (2014).
- 600 [14] Y. Artemenko, L. Axiotakis, J. Borleis, P. A. Iglesias, and P. N. Devreotes, *Proceedings of the*  
601 *National Academy of Sciences* **113**, E7500 (2016).
- 602 [15] I. Xanthis *et al.*, *Journal of cell science* **132**, jcs229542 (2019).
- 603 [16] N. Baeyens, C. Bandyopadhyay, B. G. Coon, S. Yun, and M. A. Schwartz, *The Journal of clinical*  
604 *investigation* **126**, 821 (2016).

- 605 [17] H. Qazi, R. Palomino, Z.-D. Shi, L. L. Munn, and J. M. Tarbell, *Integrative Biology* **5**, 1334  
606 (2013).
- 607 [18] J. D. Shields, M. E. Fleury, C. Yong, A. A. Tomei, G. J. Randolph, and M. A. Swartz, *Cancer cell*  
608 **11**, 526 (2007).
- 609 [19] P. G. Charest and R. A. Firtel, *Biochemical Journal* **401**, 377 (2007).
- 610 [20] H. Li *et al.*, *Nature communications* **4**, 1 (2013).
- 611 [21] S. SenGupta, C. A. Parent, and J. E. Bear, *Nature Reviews Molecular Cell Biology* **22**, 529  
612 (2021).
- 613 [22] A. J. Ridley, *Current opinion in cell biology* **36**, 103 (2015).
- 614 [23] K. M. Byrne *et al.*, *Cell systems* **2**, 38 (2016).
- 615 [24] H. E. Steele, Y. Guo, B.-Y. Li, and S. Na, *Biochemical and Biophysical Research*  
616 *Communications* **514**, 524 (2019).
- 617 [25] W. J. Polacheck, A. E. German, A. Mammoto, D. E. Ingber, and R. D. Kamm, *Proceedings of the*  
618 *National Academy of Sciences* **111**, 2447 (2014).
- 619 [26] S. Mao, A. Sarkar, Y. Wang, C. Song, D. LeVine, X. Wang, and L. Que, *Lab on a Chip* **21**, 3128  
620 (2021).
- 621 [27] N. H. Roy, S. H. J. Kim, A. Buffone Jr, D. Blumenthal, B. Huang, S. Agarwal, P. L.  
622 Schwartzberg, D. A. Hammer, and J. K. Burkhardt, *Journal of cell science* **133**, jcs248328 (2020).
- 623 [28] M.-P. Valignat, O. Theodoly, A. Gucciardi, N. Hogg, and A. C. Lellouch, *Biophysical journal*  
624 **104**, 322 (2013).
- 625 [29] N. Shakiba, R. D. Jones, R. Weiss, and D. Del Vecchio, *Cell Systems* **12**, 561 (2021).
- 626 [30] J. S. Park *et al.*, *Proceedings of the National Academy of Sciences* **111**, 5896 (2014).
- 627 [31] S. M. Brooks and H. S. Alper, *Nature Communications* **12**, 1 (2021).
- 628 [32] H. Y. Zhou, Y. L. Pon, and A. S. Wong, *Endocrinology* **148**, 5195 (2007).
- 629 [33] J. M. Buonato, I. S. Lan, and M. J. Lazzara, *Journal of cell science* **128**, 3898 (2015).
- 630 [34] A. Badache and N. E. Hynes, *Cancer research* **61**, 383 (2001).



- 631 [35] N. C. Schlegel, A. von Planta, D. S. Widmer, R. Dummer, and G. Christofori, *Experimental*  
632 *dermatology* **24**, 22 (2015).
- 633 [36] B. Mosadegh, W. Saadi, S. J. Wang, and N. L. Jeon, *Biotechnology and bioengineering* **100**, 1205  
634 (2008).
- 635 [37] B. J. Kim, P. Hannanta-Anan, M. Chau, Y. S. Kim, M. A. Swartz, and M. Wu, *PloS one* **8**,  
636 e68422 (2013).
- 637 [38] H.-r. Moon, S. Saha, A. Mugler, and B. Han, *iScience* **24**, 103242 (2021).
- 638 [39] S. Uttamsingh, X. Bao, K. T. Nguyen, M. Bhanot, J. Gong, J. L. K. Chan, F. Liu, T. T. Chu, and  
639 L. H. Wang, *Oncogene* **27**, 2626 (2008).
- 640 [40] M. Pang *et al.*, *Oncogene* **35**, 748 (2016).
- 641 [41] W. de Ronde, F. Tostevin, and P. R. Ten Wolde, *Physical review letters* **107**, 048101 (2011).
- 642 [42] V. Singh and I. Nemenman, *PLoS computational biology* **13**, e1005490 (2017).
- 643 [43] M. Carballo-Pacheco, J. Desponds, T. Gavrilchenko, A. Mayer, R. Prizak, G. Reddy, I.  
644 Nemenman, and T. Mora, *Physical Review E* **99**, 022423 (2019).
- 645 [44] T. Mora, *Physical review letters* **115**, 038102 (2015).
- 646 [45] J.-B. Lalanne and P. François, *Proceedings of the National Academy of Sciences* **112**, 1898  
647 (2015).
- 648 [46] Q. Huang, X. Hu, W. He, Y. Zhao, S. Hao, Q. Wu, S. Li, S. Zhang, and M. Shi, *American journal*  
649 *of cancer research* **8**, 763 (2018).
- 650 [47] J. Varennes, H.-r. Moon, S. Saha, A. Mugler, and B. Han, *PLOS Computational Biology* **15**,  
651 e1006961 (2019).
- 652 [48] M. J. Bradney, S. M. Venis, Y. Yang, S. F. Konieczny, and B. Han, *Small*, 1905500 (2020).
- 653 [49] J. B. Beltman, A. F. Marée, and R. J. De Boer, *Nature Reviews Immunology* **9**, 789 (2009).
- 654 [50] M. Skoge, H. Yue, M. Erickstad, A. Bae, H. Levine, A. Groisman, W. F. Loomis, and W.-J.  
655 Rappel, *Proceedings of the National Academy of Sciences* **111**, 14448 (2014).

- 656 [51] R. Karmakar, M.-H. Tang, H. Yue, D. Lombardo, A. Karanam, B. A. Camley, A. Groisman, and  
657 W.-J. Rappel, *Physical Review E* **103**, 012402 (2021).
- 658 [52] G. Follain, D. Herrmann, S. Harlepp, V. Hyenne, N. Osmani, S. C. Warren, P. Timpson, and J. G.  
659 Goetz, *Nature Reviews Cancer*, **1** (2019).
- 660 [53] M. A. Swartz and M. E. Fleury, *Annual Review of Biomedical Engineering* **9**, 229 (2007).
- 661 [54] M. W. Dewhirst and T. W. Secomb, *Nature Reviews Cancer* **17**, 738 (2017).
- 662 [55] J. Varennes and A. Mugler, *Molecular pharmaceuticals* **13**, 2224 (2016).
- 663 [56] B. Hu, W. Chen, W.-J. Rappel, and H. Levine, *Physical review letters* **105**, 048104 (2010).
- 664 [57] D. Ellison *et al.*, *Proceedings of the National Academy of Sciences* **113**, E679 (2016).
- 665 [58] P. J. Van Haastert and M. Postma, *Biophysical journal* **93**, 1787 (2007).
- 666 [59] D. Fuller, W. Chen, M. Adler, A. Groisman, H. Levine, W.-J. Rappel, and W. F. Loomis,  
667 *Proceedings of the National Academy of Sciences* **107**, 9656 (2010).
- 668 [60] H. D. Moreau, M. Piel, R. Voituriez, and A.-M. Lennon-Duménil, *Trends in immunology* **39**, 632  
669 (2018).
- 670 [61] X. Zhang *et al.*, *Current Opinion in Biotechnology* **66**, 236 (2020).
- 671 [62] T. Frei, F. Cella, F. Tedeschi, J. Gutiérrez, G.-B. Stan, M. Khammash, and V. Siciliano, *Nature*  
672 *communications* **11**, 1 (2020).
- 673 [63] W. Weber and M. Fussenegger, *Nature Reviews Genetics* **13**, 21 (2012).
- 674 [64] T. Ozdemir, A. J. Fedorec, T. Danino, and C. P. Barnes, *Cell systems* **7**, 5 (2018).
- 675 [65] D. T. Riglar and P. A. Silver, *Nature Reviews Microbiology* **16**, 214 (2018).
- 676 [66] I. Y. Hwang, M. H. Tan, E. Koh, C. L. Ho, C. L. Poh, and M. W. Chang, *ACS synthetic biology*  
677 **3**, 228 (2014).
- 678 [67] C. A. Miller, J. M. Ho, S. E. Parks, and M. R. Bennett, *ACS Synthetic Biology* **10**, 258 (2021).
- 679 [68] H. Ye and M. Fussenegger, *FEBS letters* **588**, 2537 (2014).
- 680 [69] M.-R. Wu, B. Jusiak, and T. K. Lu, *Nature Reviews Cancer* **19**, 187 (2019).
- 681 [70] L. F. Sempere, J. R. Gunn, and M. Korc, *Cancer Biol. Ther.* **12**, 198 (2011).

- 682 [71] C. A. Whipple, A. L. Young, and M. Korc, *Oncogene* **31**, 2535 (2011).
- 683 [72] H.-r. Moon, A. Ozcelikkale, Y. Yang, B. D. Elzey, S. F. Konieczny, and B. Han, *Lab on a Chip*  
684 **20**, 3720 (2020).
- 685 [73] D. Huber, A. Oskoei, X. Casadevall i Solvas, A. Demello, and G. V. Kaigala, *Chemical reviews*  
686 **118**, 2042 (2018).
- 687 [74] W. J. Polacheck, J. L. Charest, and R. D. Kamm, *Proceedings of the National Academy of*  
688 *Sciences* **108**, 11115 (2011).
- 689 [75] V. L. Cross, Y. Zheng, N. W. Choi, S. S. Verbridge, B. A. Sutermaister, L. J. Bonassar, C.  
690 Fischbach, and A. D. Stroock, *Biomaterials* **31**, 8596 (2010).
- 691 [76] P. A. Galie and J. P. Stegemann, *Tissue Engineering Part C: Methods* **17**, 527 (2011).
- 692 [77] C. P. Ng and M. A. Swartz, *American Journal of Physiology-Heart and Circulatory Physiology*  
693 **284**, H1771 (2003).
- 694 [78] B. A. Harley, H.-D. Kim, M. H. Zaman, I. V. Yannas, D. A. Lauffenburger, and L. J. Gibson,  
695 *Biophysical journal* **95**, 4013 (2008).
- 696
- 697
- 698

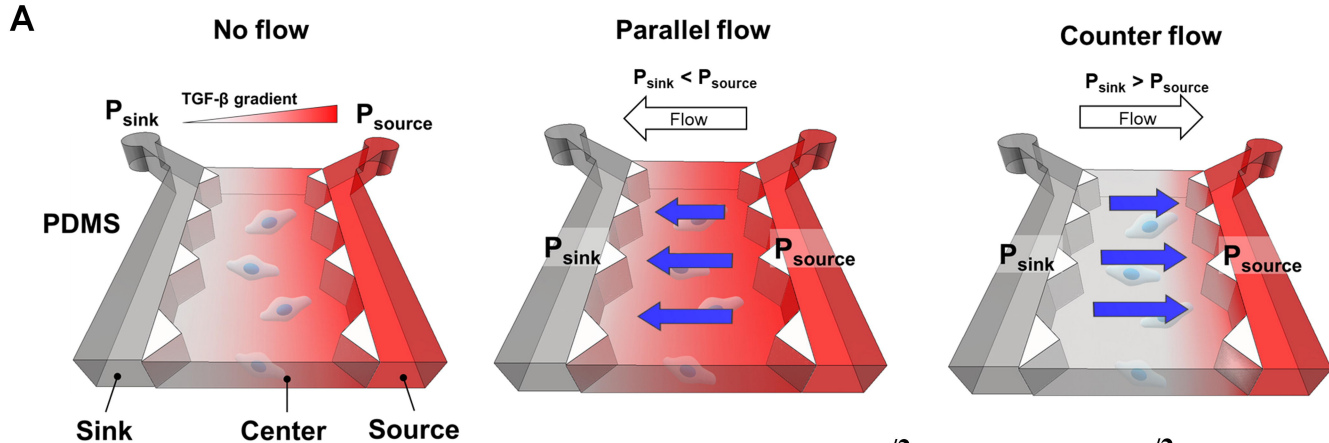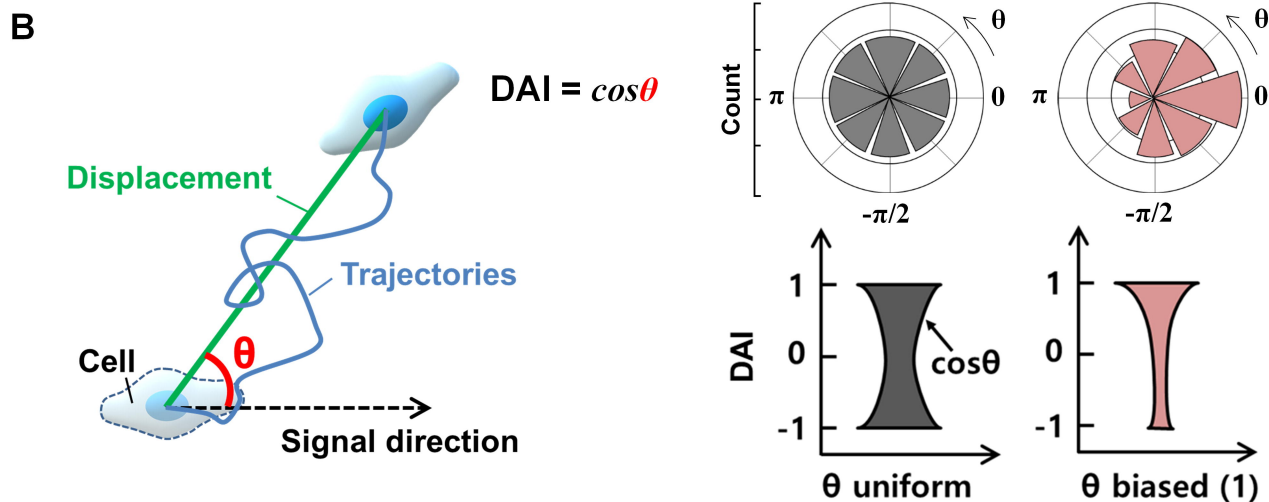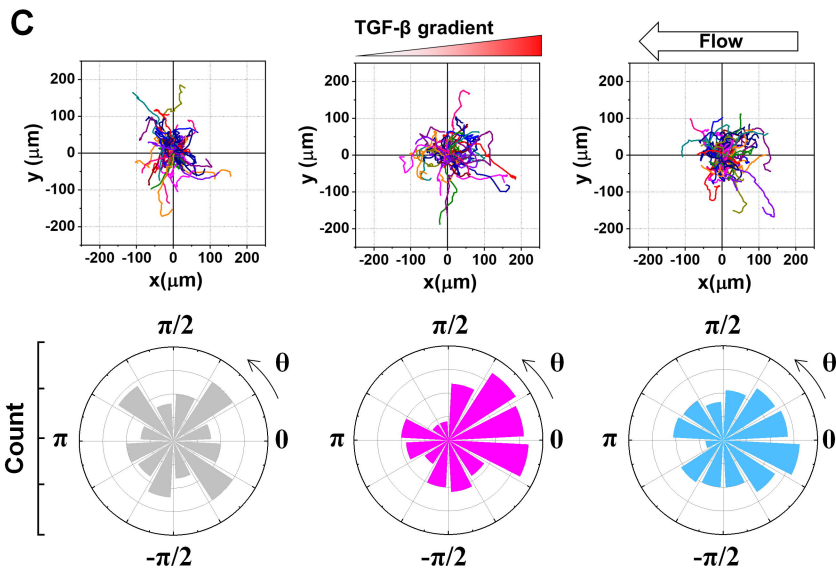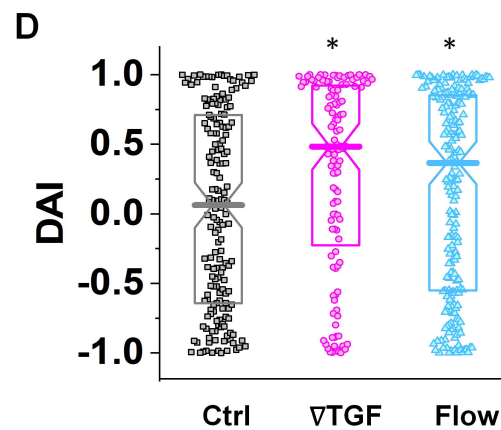

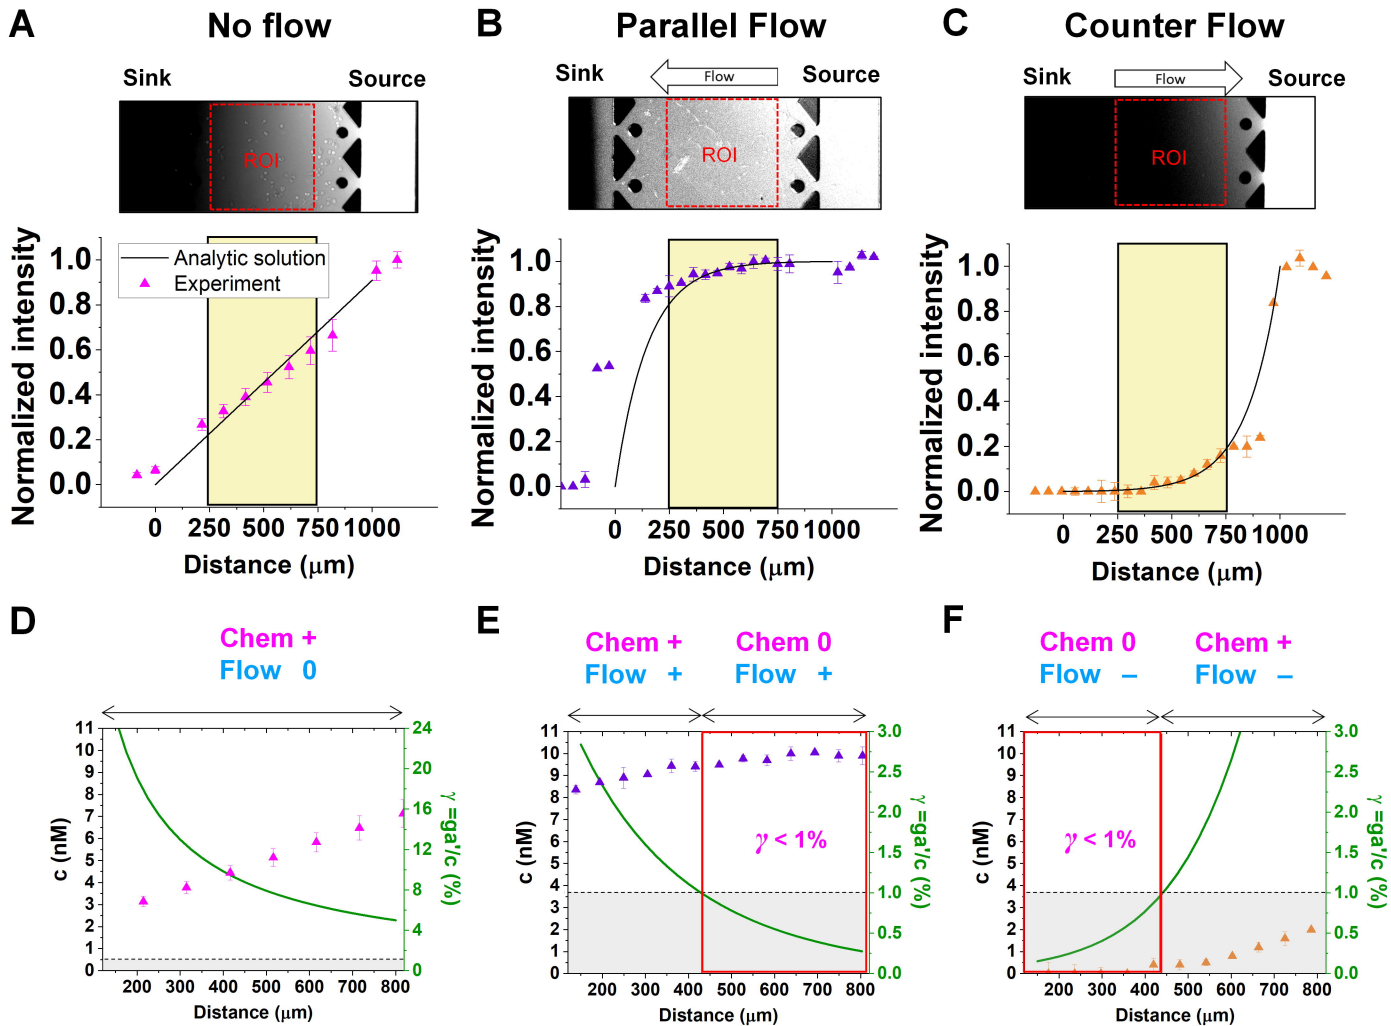

**A** $\nabla$ TGF + Parallel flow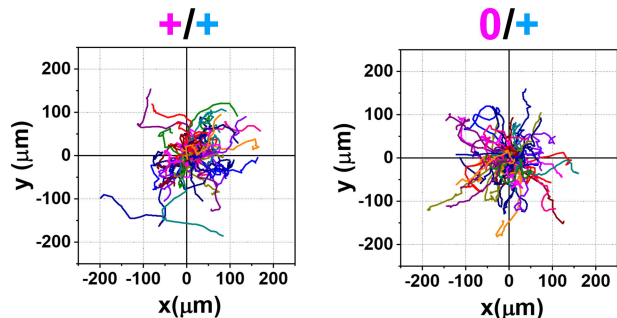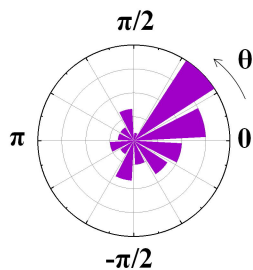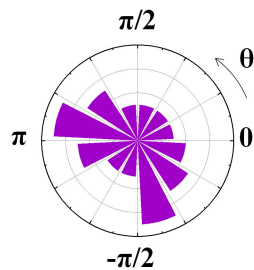**B** $\nabla$ TGF + Counter flow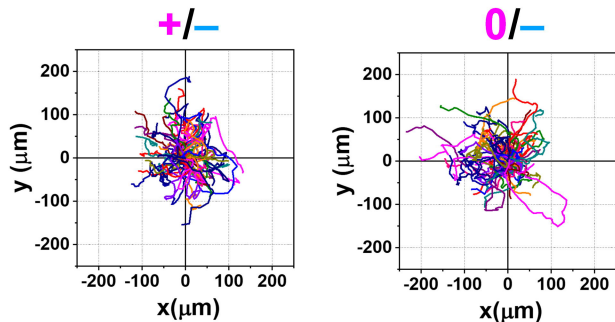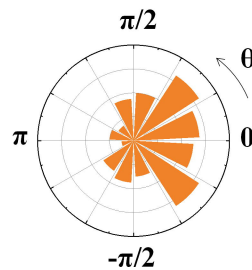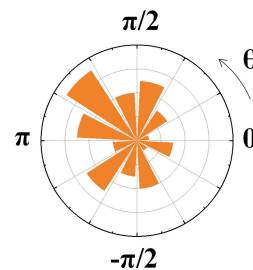**C**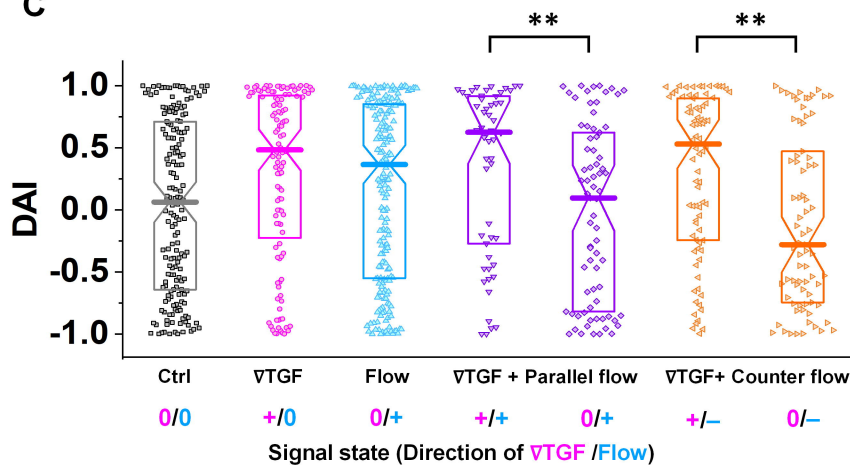**D**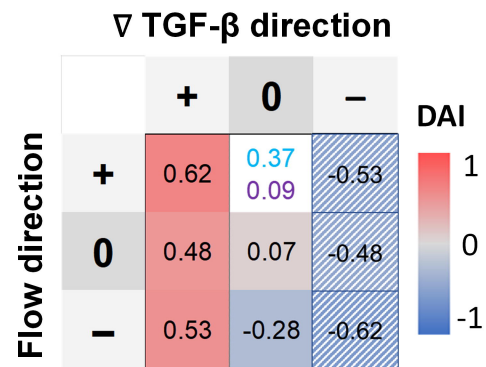

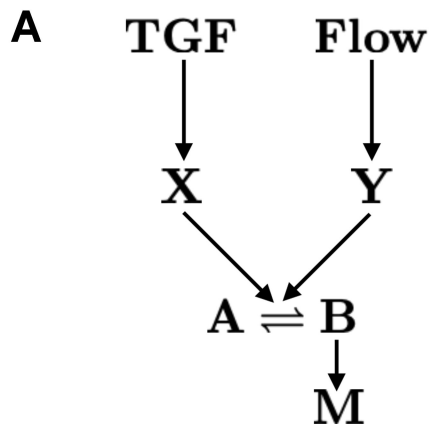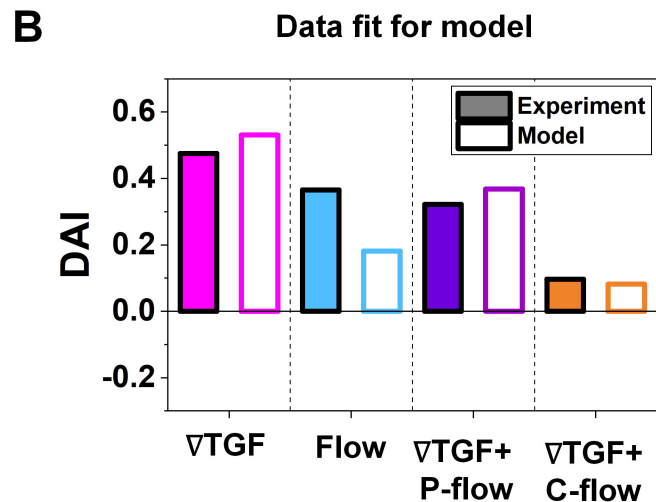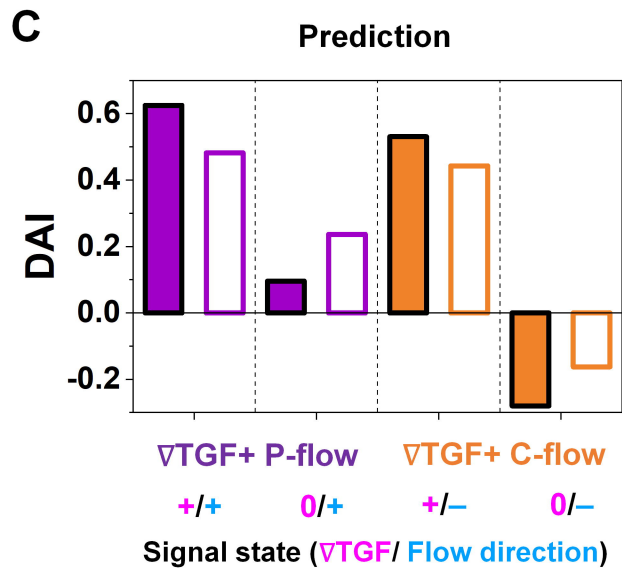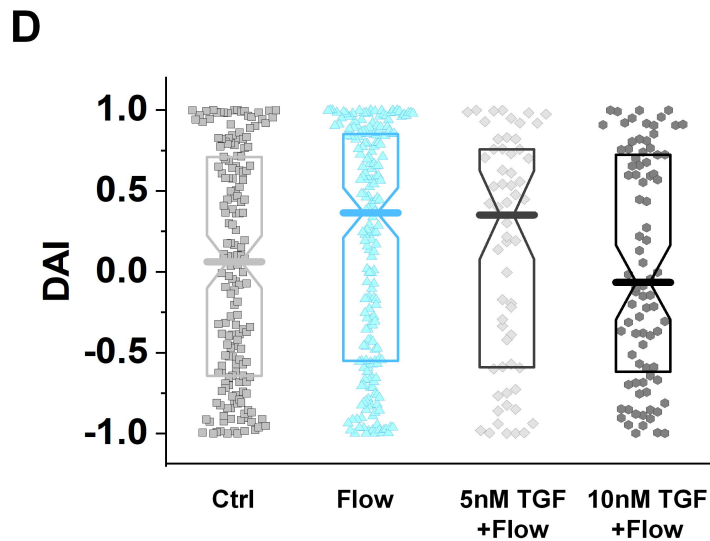

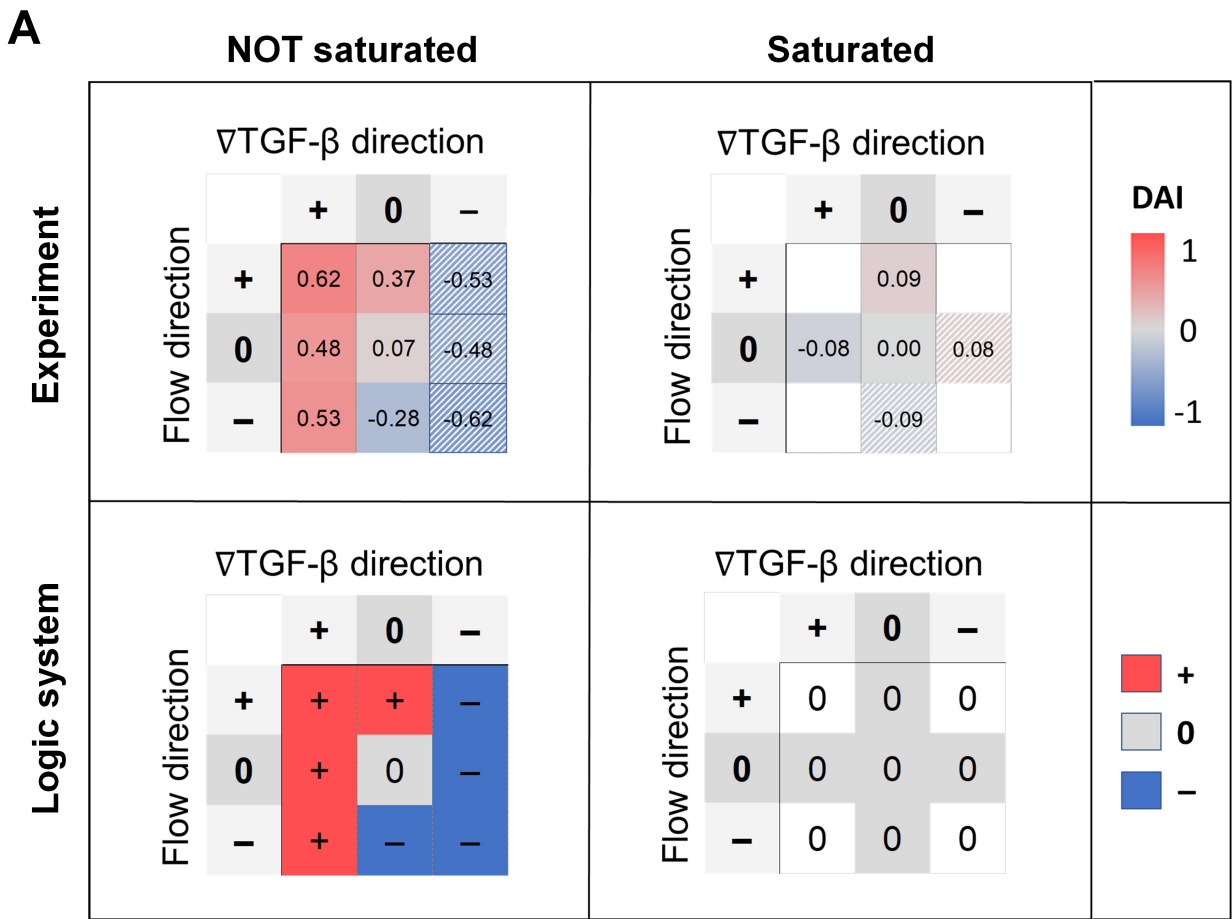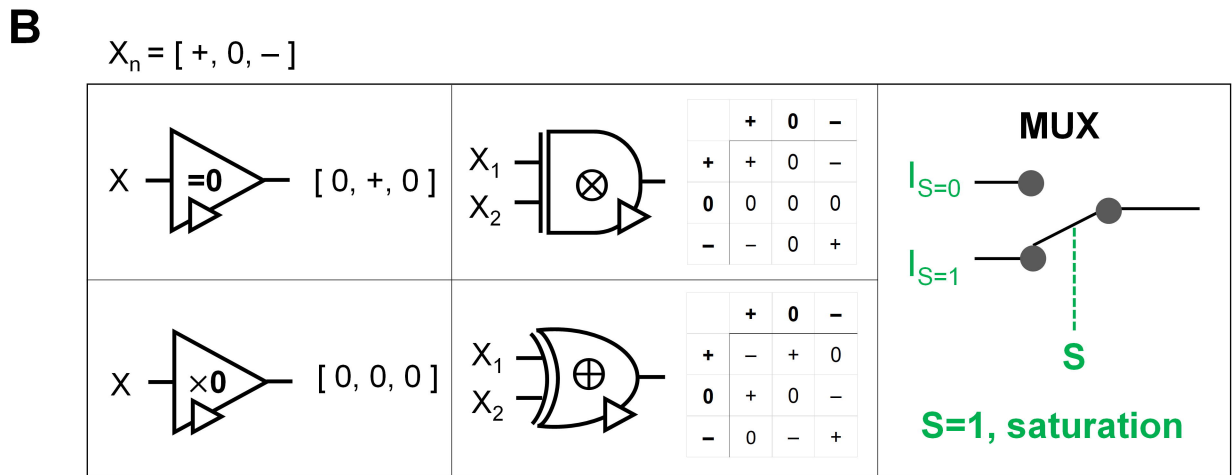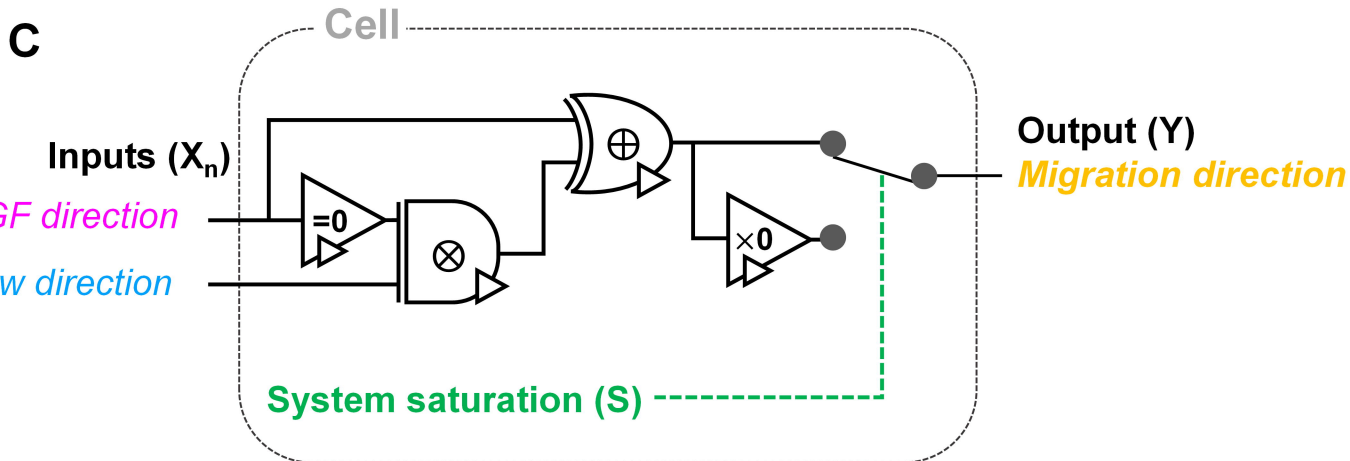

Source: http://biorxiv.org/content/10.1101/2022.04.28.489798v1.full.pdf
